# Supplementary material
Source: Research Square preprint supplement (doi:10.21203/rs.3.rs-9427392/v1)
Supplement: Supplementary file 1 [file 9a054ed6c50181b2d436ff0c.docx]

## Supplementary files for

Disaccharide production in marine cold seeps links dissolved organic carbon to anaerobic oxidation of methane

Lennart Stock**1,2*****,** Gunter Wegener1,3,4, John W. Pohlman5, Laura L. Lapham6, Karen G. Lloyd7,8, Leketha Williams9, Stian Torset3,4, Ellen Lalk5, Anna Hildebrand6, Lukas Dirksen1, Aman A. Mundanatt1,4, Rachel Wilson9, Jeffrey S. Seewald10, Manuel Liebeke4,11, and Marcus Elvert1,12*

1MARUM – Center for Marine Environmental Sciences, University of Bremen, D-28359 Bremen, Germany
2ICBM – Institute for Chemistry and Biology of the Marine Environment, Carl von Ossietzky University of Oldenburg, D-26129 Oldenburg, Germany
3Alfred Wegener Institute for Polar and Marine Research, D-27515 Bremerhaven, Germany
4Max Planck Institute for Marine Microbiology, D-28359 Bremen, Germany
5US Geological Survey, Woods Hole Coastal and Marine Science Center, Woods Hole, MA, USA US Geological Survey
6University of Maryland Center for Environmental Science, Chesapeake Biological Laboratory, Solomons, MD, USA 5US Geological
7University of Southern California, Los Angeles, CA, USA
8University of Tennessee, Knoxville, TN, USA
9Florida State University, Department of Earth, Ocean and Atmospheric Science, Tallahassee, FL, USA
10Woods Hole Oceanographic Institution, Woods Hole, MA, USA
11University of Kiel, Institute for Metabolomics, D-24118 Kiel, Germany
12Faculty of Geosciences, University of Bremen, D-28359 Bremen, Germany
* Corresponding Authors

### Supplementary discussion

Sediments cores MUC09-2 (length of 27 cm), MUC09-3 (length of 33 cm), and MUC09-4 (length of 30 cm) were collected video guided MC-400 multi-coring system deployed near the north rim of Astoria Canyon at a site previously explored during *ROV Hercules* dives H1866 and H1867 (Baumberger et al., 2022). The site is located along a ridge of a headless canyon in an area where gas hydrate formed from microbial and thermogenic gases are outcropping at the seafloor (Baumberger et al., 2018). Similar outcroppings with the characteristic orange-yellow coloration of thermogenic gas hydrate were observed during *DSV2 Alvin* Dive 5214 during this expedition at a site named here as the Sable Seep, and where the MUC09 multicore set was collected. The cores were preselected for analyses specific to the goals of the project: MUC09-2 was designated for DOM characterization. MUC09-3 was designated for detailed geochemical analysis including the disaccharides, dissolved organic carbon (DOC) and lipids presented and described in this study. MUC09-4 was designated for radiocarbon measurement and the microbiological analysis reported in this study (see also Table 1 of the main text). Porewater from each core was also collected for the analysis of dissolved inorganic carbon (DIC) concentration and δ13C values as well as the major anions sulfate and chloride. Cores MUC09-3 and MUC09-4 were also sampled for analysis of dissolved methane concentration and δ13C values. Profiles of these analytes are used to link biogeochemical processes across the cores and to evaluate the spatial heterogeneity of the area sampled.

The MUC09-3 porewater profiles of sulfate, DIC and methane concentrations (Supplementary Fig. 2 and 3) and the δ13C profiles of methane and DIC (Supplementary Fig. 4) were distinct from MUC09-2 and MUC09-4, as were the methane concentration profiles between MUC09-3 and MUC09-4 (Supplementary Fig. 2). The principal distinction is that sulfate was more abundant and DIC and H2S less abundant in the SMTZ of MUC09-3 and the δ13C methane and DIC within the SMTZ of MUC09-3 were lower. For the methane concentration profiles, we observed a peak in concentration of 4.07 mM at 7.5 cmbsf in core MUC09-4 that was only reached in core MUC09-3 below the SMTZ. On the other hand, sulfate and DIC concentration profiles from MUC09-2 and MUC09-4 were similar with sulfate concentrations decreasing from intermediate values (17 – 23 mM) relative to seawater (28 mM) nearest the seafloor to near zero at 10.5 cmbsf. DIC concentrations increased from values slightly elevated (8 - 13 mM) relative to seawater (2.1 mM) near the seafloor to consistently high concentrations of 25 – 28 mM through the remainder of the core. The sulfate profile differed in MUC09-3 below 7.5 cm where sulfate concentrations remained elevated until below the SMTZ at 25.5 cmbsf.

The differences in the geochemical profile of MUC09-3 from the other cores can be best explained by a sequence of events where fluids containing sulfate and dissolved methane were laterally entrained into the SMTZ and, subsequently, AOM consumed some of the methane and sulfate. Sulfate in marine sediment is derived from ocean bottom water; thus, the presence of elevated sulfate at greater depth in a core requires a lateral input of seawater such as gas expulsion-driven pumping and aqueous entrainment observed at Hydrate Ridge (Tryon et al., 2002). Elevated methane (see Fig 2) with distinctly more negative δ13C values suggests the fluids entrained also transported methane into the SMTZ. DIC and H2S concentrations in the most active AOM region being lower than sediment depths above and below also suggest intrusion of and dilution by seawater. DIC from seawater and in MUC09-3 has a lower δ13C than the other cores. That condition requires that AOM converted methane into DIC after the fluid intrusion event, and furthermore precludes the possibility that the fluid intrusion occurred during core handling and recovery. If the DIC was introduced by seawater during core handling and recovery the δ13C-DIC values would be more positive than those from MUC09-2 and MUC09-4. The DIC concentration profile being both diluted by seawater and concentrated by the production of DIC suggests the fluid pulse was from an event that preceded the accumulation of AOM products, including sulfide (see Fig 2).

If AOM was removing methane, the δ¹³C of the residual methane would be expected to be more positive than the original pool. One interpretation is that cold seeps systems are so heterogenous that methane in MUC09-3 and MUC09-4, although the cores being only 20 cm apart, comes from different sources or at least from different proportions of two isotopically distinct sources. There is a known thermogenic gas supply sustaining the seafloor gas hydrate outcroppings in Astoria Canyon (Baumberger et al., 2018). Vertical migration of that gas toward the seafloor explains the δ13C-CH4 of the deeper portion of the MUC09-4 profile being more positive. Consistent with our interpretation of fluid injection into the MUC09-3 profile, this interpretation suggests that in this core, but not the two adjacent cores MUC09-2 and -4, contained ¹³C-depleted microbial methane, which is known to occur in the shallow sediments of Astoria Canyon (Lalk et al., 2025). The combination of sulfate and methane in the broad SMTZ of MUC09-3 would be expected to support AOM, thereby accounting for the accumulation of ¹³C-depleted DIC, DOC, TOC, AOM-type lipids as well as the disaccharides sucrose and trehalose. Finally, the high potential of Sable Seep sediments to perform AOM has been previously evidenced by Stock et al. (2025) in their SIP experiments.

The potential that the porewater methane within the SMTZ of MUC09-3 was produced *in situ* by hydrogenotrophic CO₂ reduction is unlikely, despite other studies showing it is possible to produce methane by hydrogenotrophic methanogenesis in settings with abundant sulfate and reactive sediment organic matter (Coon et al., 2023). In core MUC09-3, the isotopic separation between the methane and DIC for both cores is, on average, 31.3 ± 3.9. Isotopic separation is the expression of the fractionation effect that occurs when CO2 is reduced to methane and is expressed as an isotope separation factor (εc), calculated as the δ13C difference between CO2 (or DIC) and methane. The expected isotopic separation for methanogenesis alone in marine sediments ranges from 49 to 95 (Whiticar, 1999), which is much greater than we observed in the SMTZ of MUC09-3. Under normal AOM conditions, any residual methane would be driven toward more positive values, which lowers the isotopic separation between methane and DIC, as is observed here. Moreover, we note that the observed 13C-depleted DIC and DOC are not expected products of methanogenesis. Taken together, the pore water geochemical data from the MUC09 multicore and the SIP experiments from MUC10 support that AOM is a central process structuring the porewater profiles.

### Supplementary tables

Supplementary Table 1: Geochemical parameters of the cold seep (MUC09-3,4,2) and the reference core (MUC08-4).

Concentrations in mM of methane (CH4), dissolved inorganic carbon (DIC), sulfate (SO42-), hydrogen sulfide (∑H2S), and dissolved organic carbon (DOC). Stable carbon isotopic composition (δ13C) in‰ vs. VPDB of CH4, DIC and DOC. The cold seep data (MUC09-3) has been presented before in (Lalk et al., 2025), except for the porosity, δ13C-CH4 and ∑H2S.

|  |  | **Depth** |  |  | **Concentration [mM]** | | | | | | **Wt%** | **δ13C [‰]** | | | |
| --- | --- | --- | --- | --- | --- | --- | --- | --- | --- | --- | --- | --- | --- | --- | --- |
| **Core** | **ID** | **[cmbsf]** | **type** | **Porosity** | **SO42-** | **∑H2S** | **Cl** | **DIC** | **CH4** | **DOC** | **TOC** | **DIC** | **CH4** | **DOC** | **TOC** |
| **MUC08-4** | 275 | 1 | **Reference** | 0.88 | 28.0 | 0.14 | 545 | 2.3 |  | 0.49 |  | -2.8 |  | -22.9 |  |
| 276 | 6 | 0.87 | 27.8 | 0.12 | 543 | 2.4 |  |  | 2.3 | -3.8 |  |  | -25.0 |
| 277 | 11 | 0.87 | 27.9 | 0.10 | 544 | 2.9 |  | 0.44 |  | -3.9 |  | -23.3 |  |
| 278 | 16 | 0.89 | 28.0 | 0.11 | 543 | 2.5 |  |  | 2.4 | -3.14 |  |  | -24.8 |
| 279 | 21 | 0.86 | 27.7 | 0.14 | 540 | 2.2 |  | 0.38 |  | -3.8 |  | -22.8 |  |
| 280 | 26 | 0.85 | 27.8 | 0.11 | 545 | 3.0 |  |  | 2.3 | -5.7 |  |  | -25.5 |
| 281 | 31 | 0.84 | 27.5 | 0.12 | 549 | 3.2 |  | 0.67 |  | -7.5 |  | -22.8 |  |
| 282 | 36 | 0.84 | 26.8 | 0.12 | 544 | 4.3 |  |  | 2.2 | -9.6 |  |  | -25.2 |
| 283 | 41 | 0.86 | 26.7 | 0.13 | 548 | 5.6 |  | 0.61 |  | -10.5 |  | -23.6 |  |
| **MUC09-3** | 335 | 1.5 | **Cold seep** | 0.86 | 23.4 | 2.4 | 513 | 1.3 | 0.23 | 0.71 | 2.8 | -15.2 | -54.7 | -20.9 | -23.7 |
| 336 | 4.5 | 0.88 | 12.3 | 9.9 | 514 | 18.1 | 0.82 | 0.62 | 2.7 | -29.4 | -55.0 | -23.3 | -24.5 |
| 337 | 7.5 | 0.87 | 6.4 | 16.1 | 510 | 22.7 | 1.27 | 0.48 | 2.7 | -29.4 | -57.8 | -28.4 | -27.5 |
| 338 | 10.5 | 0.87 | 5.9 | 16.6 | 504 | 22.9 | 1.91 | 0.50 | 2.8 | -28.9 | -58.4 | -29.4 | -27.1 |
| 339 | 13.5 | 0.86 | 5.8 | 15.7 | 499 | 20.5 | 1.76 | 0.65 | 2.8 | -28.8 | -54.8 | -28.3 | -26.6 |
| 340 | 16.5 | 0.87 | 7.1 | 17.4 | 512 | 21.0 | 1.65 | 0.75 | 2.7 | -29.0 | -55.2 | -31.1 | -26.6 |
| 341 | 19.5 | 0.84 | 7.6 | 14.8 | 511 | 19.3 | 1.97 | 0.95 | 2.6 | -29.4 | -56.0 | -35.3 | -27.3 |
| 342 | 22.5 | 0.82 | 5.9 | 12.1 | 514 | 19.3 | 2.10 | 0.77 | 2.6 | -25.9 | -52.7 | -40.0 | -26.9 |
| 343 | 25.5 | 0.82 | 2.0 | 14.2 | 509 | 24.4 | 4.38 | 0.91 | 2.3 | -23.4 | -57.4 | -24.1 | -25.2 |
| 344 | 28.5 | 0.81 | 0.6 | 15.5 | 506 | 23.6 | 3.32 | 0.79 | 2.2 | -17.6 | -49.1 | -23.3 | -25.5 |
| 345 | 31.5 | 0.81 | - | 16.7 | 505 | 25.1 | 3.11 | 0.88 | 2.2 | -12.6 | -44.5 | -23.3 | -25.9 |
| **MUC09-4** | 346 | 1.5 | **Cold seep** | 0.89 | 17.6 |  | 514 | 12.8 | 1.57 |  |  | -18.4 | -52.6 |  |  |
| 347 | 4.5 | 0.85 | 5.98 |  | 523 | 23.5 | 3.14 |  |  | -16.8 | -54.0 |  |  |
| 348 | 7.5 | 0.86 | 3.69 |  | 521 | 23.9 | 4.07 |  |  | -13.9 | -50.0 |  |  |
| 349 | 10.5 | 0.87 | 0.07 |  | 587 | 26.5 | 3.00 |  |  | -14.3 | -47.8 |  |  |
| 350 | 13.5 | 0.87 | 0.03 |  | 515 | 24.1 | 3.44 |  |  | -14.1 | -48.6 |  |  |
| 351 | 16.5 | 0.87 | 0.66 |  | 514 | 26.2 | 2.53 |  |  | -17.1 | -47.8 |  |  |
| 352 | 19.5 | 0.85 | 0.02 |  | 508 | 25.6 | 1.71 |  |  | -14.2 | -46.0 |  |  |
| 353 | 22.5 | 0.83 | 0.03 |  | 510 | 26.0 | 2.29 |  |  | -12.9 | -44.4 |  |  |
| 354 | 25.5 | 0.83 | 0.01 |  | 508 | 25.9 | 2.05 |  |  | -11.7 | -43.0 |  |  |
| 355 | 28.5 | 0.81 | 0.02 |  | 506 | 26.3 | 2.28 |  |  | -10.0 | -41.2 |  |  |
| **MUC09-2** | 356 | 1.5 | **Cold seep** |  | 22.5 |  | 510 | 7.8 |  |  |  | -16.8 |  |  |  |
| 357 | 4.5 |  | 12.9 |  | 513 | 17.7 |  |  |  | -21.3 |  |  |  |
| 358 | 7.5 |  | 3.89 |  | 513 | 23.5 |  |  |  | -17.5 |  |  |  |
| 359 | 10.5 |  | 1.04 |  | 511 | 27.1 |  |  |  | -15.7 |  |  |  |
| 360 | 13.5 |  | 0.89 |  | 504 | 23.3 |  |  |  | -15.7 |  |  |  |
| 361 | 16.5 |  | 1.01 |  | 515 | 28.3 |  |  |  | -14.0 |  |  |  |
| 362 | 19.5 |  | 0.45 |  | 509 | 24.6 |  |  |  | -10.0 |  |  |  |
| 363 | 22.5 |  | 0.03 |  | 513 | 25.0 |  |  |  | -9.0 |  |  |  |
| 364 | 25.5 |  | 0.02 |  | 515 | 25.9 |  |  |  | -8.0 |  |  |  |

Supplementary Table 2: Relative abundance of microbial taxa in the cold seep (MUC09-3) and the reference core (MUC08-4) based on 16S rRNA gene amplicon sequencing.

16S rRNA gene relative abundance data in [%] used to create Fig. 4 and Supplementary Fig. 3. The complete table displays all levels from Kingdom down to genus. Species below 1.5% for each level were assigned to “Other archaea” or “Other bacteria”.

| **MUC** | **MUC08-4** | | | | | | **MUC09-3** | | | | | | | | | |
| --- | --- | --- | --- | --- | --- | --- | --- | --- | --- | --- | --- | --- | --- | --- | --- | --- |
| **Type** | **Reference** | | | | | | **Cold seep** | | | | | | | | | |
| **ID** | 285 | 286 | 287 | 288 | 289 | 290 | 346 | 347 | 348 | 349 | 350 | 351 | 352 | 353 | 354 | 355 |
| **Depth [cmbsf]** | 1 | 6 | 11 | 16 | 21 | 26 | 1.5 | 4.5 | 7.5 | 10.5 | 13.5 | 16.5 | 19.5 | 22.5 | 25.5 | 28.5 |
| **Kingdom [% rel. abundance]** | | | | | | | | | | | | | | | | |
| **Archaea** | 3.9 | 4.6 | 2.2 | 3.6 | 4.9 | 6.3 | 12.4 | 23.9 | 35.3 | 25.8 | 22.6 | 31.8 | 32.4 | 14.7 | 11.9 | 12.7 |
| **Bacteria** | 96.1 | 95.4 | 97.8 | 96.4 | 95.1 | 93.7 | 87.6 | 76.1 | 64.7 | 74.2 | 77.4 | 68.2 | 67.6 | 85.3 | 88.1 | 87.3 |
| **Phylum [% rel. abundance]** | | | | | | | | | | | | | | | | |
| **Thaumarchaeota** | 2.6 | 1.9 | - | - | - | - | - | - | - | - | - | - | - | - | - | - |
| **Other Archaea** | 1.3 | 2.7 | 2.2 | 3.6 | 4.9 | 4.3 | 1.2 | 1.2 | 3.9 | 2.2 | 2.6 | 3.1 | 3.0 | 4.8 | 5.2 | 4.9 |
| **Proteobacteria** | 50.5 | 45.6 | 49.3 | 51.3 | 45.6 | 45.3 | 23.6 | 22.8 | 37.2 | 34.5 | 34.9 | 49.5 | 34.7 | 32.4 | 32.1 | 28.2 |
| **Bacteroidetes** | 11.1 | 8.8 | 5.9 | 6.2 | 5.2 | 3.1 | 9.0 | 6.5 | 4.2 | 5.2 | 6.3 | 3.4 | 2.9 | 6.1 | 6.0 | 3.9 |
| **Planctomycetes** | 10.4 | 10.4 | 10.3 | 12.3 | 11.7 | 11.6 | 3.3 | 4.1 | 3.5 | 4.5 | 5.5 | 2.7 | 3.4 | 9.9 | 9.2 | 9.3 |
| **Other Bacteria** | 7.9 | 11.7 | 10.9 | 9.2 | 11.4 | 12.0 | 11.2 | 10.7 | 10.1 | 10.0 | 13.4 | 11.0 | 10.9 | 13.5 | 12.6 | 10.5 |
| **Actinobacteria** | 4.8 | 5.3 | 6.1 | 3.8 | 4.4 | 3.1 | 2.0 | 1.5 | 1.6 | 4.5 | 3.6 | - | 2.6 | 2.8 | 1.7 | 2.8 |
| **Chloroflexi** | 4.5 | 8.9 | 9.4 | 7.8 | 10.9 | 11.3 | 4.5 | 5.7 | 4.0 | 7.1 | 6.2 | 1.6 | 6.7 | 7.1 | 12.3 | 13.0 |
| **Acidobacteria** | 3.5 | 4.7 | 5.9 | 3.8 | 4.3 | 4.7 | - | - | - | 3.2 | 2.8 | - | 2.3 | 4.6 | 5.1 | 4.5 |
| **Kiritimatiellaeota** | 1.8 | - | - | - | - | - | - | - | - | - | - | - | - | - | - | - |
| **Verrucomicrobia** | 1.5 | - | - | - | - | - | - | - | - | - | - | - | - | - | - | - |
| **Latescibacteria** | - | - | - | 1.8 | 1.6 | 2.6 | - | 3.3 | 2.0 | 2.4 | 2.2 | - | 1.8 | 3.0 | 2.4 | 1.9 |
| **Crenarchaeota** | - | - | - | - | - | 1.9 | - | - | - | - | - | - | - | - | - | - |
| **Euryarchaeota** | - | - | - | - | - | - | 8.8 | 21.0 | 31.4 | 23.6 | 18.3 | 28.6 | 29.4 | 8.1 | 4.6 | 5.8 |
| **Nanoarchaeaeota** | - | - | - | - | - | - | 2.4 | 1.8 | - | - | - | - | - | - | - | - |
| **Epsilonbacteraeota** | - | - | - | - | - | - | 34.1 | 21.5 | 2.1 | 2.9 | 2.4 | - | - | 1.6 | 2.3 | 3.3 |
| **Asgardaeota** | - | - | - | - | - | - | - | - | - | - | 1.7 | - | - | 1.9 | 2.2 | 2.0 |
| **Firmicutes** | - | - | - | - | - | - | - | - | - | - | - | - | 2.2 | - | - | 3.0 |
| **Atribacteria** | - | - | - | - | - | - | - | - | - | - | - | - | - | 2.4 | 4.4 | 5.0 |
| **Acetothermia** | - | - | - | - | - | - | - | - | - | - | - | - | - | 1.8 | - | - |
| **Calditrichaeota** | - | - | - | - | - | - | - | - | - | - | - | - | - | - | - | 1.9 |
| **Class [% rel. abundance]** | | | | | | | | | | | | | | | | |
| **Nitrososphaeria** | 2.6 | 1.9 | - | - | - | - | - | - | - | - | - | - | - | - | - | - |
| **Other Archaea** | 1.3 | 2.7 | 2.2 | 3.6 | 4.9 | 4.3 | 1.8 | 3.4 | 4.1 | 2.4 | 3.0 | 3.2 | 3.2 | 5.5 | 7.8 | 7.8 |
| **Gammaproteobacteria** | 24.1 | 18.5 | 19.9 | 19.7 | 17.6 | 18.0 | 3.8 | 3.0 | 5.5 | 8.9 | 7.3 | 1.6 | 3.8 | 8.7 | 9.4 | 6.2 |
| **Deltaproteobacteria** | 23.4 | 24.4 | 27.1 | 29.5 | 26.2 | 25.5 | 19.0 | 18.9 | 30.6 | 23.3 | 25.2 | 47.5 | 29.5 | 21.6 | 21.4 | 20.2 |
| **Other Bacteria** | 13.8 | 19.7 | 18.4 | 19.9 | 20.9 | 21.5 | 14.1 | 16.9 | 16.8 | 15.9 | 20.9 | 13.7 | 19.9 | 21.4 | 20.7 | 21.0 |
| **Bacteroidia** | 10.4 | 8.1 | 5.4 | 5.8 | 4.8 | 2.6 | 8.8 | 6.4 | 4.2 | 5.0 | 6.2 | 3.4 | 2.9 | 5.9 | 5.9 | 3.7 |
| **Planctomycetacia** | 4.9 | 3.4 | 4.2 | 3.3 | 3.3 | 2.3 | 1.7 | - | - | 1.8 | 2.2 | - | - | 3.0 | 2.5 | 2.5 |
| **Acidimicrobiia** | 4.4 | 4.6 | 5.4 | 3.5 | 4.0 | 2.7 | 1.8 | - | - | 3.9 | 2.9 | - | 2.0 | 1.8 | - | - |
| **Anaerolineae** | 3.8 | 7.5 | 7.9 | 6.6 | 8.8 | 7.5 | 4.2 | 5.2 | 3.6 | 6.1 | 5.3 | - | 5.9 | 5.7 | 11.0 | 11.1 |
| **Phycisphaerae** | 2.5 | 4.7 | 4.2 | 6.4 | 5.6 | 6.5 | - | 2.1 | 1.9 | 2.1 | 2.7 | 2.0 | 1.6 | 5.6 | 5.6 | 5.8 |
| **Alphaproteobacteria** | 2.1 | 2.2 | 2.1 | - | - | 1.5 | - | - | - | 2.2 | 2.3 | - | - | 1.9 | - | 1.6 |
| **Thermoanaerobaculia** | 1.8 | 2.3 | 3.2 | 1.8 | 2.3 | 2.0 | - | - | - | 1.9 | - | - | - | 1.6 | - | - |
| **Kiritimatiellae** | 1.8 | - | - | - | - | - | - | - | - | - | - | - | - | - | - | - |
| **Brocadiae** | 1.5 | - | - | - | - | - | - | - | - | - | - | - | - | - | - | - |
| **Verrucomicrobiae** | 1.5 | - | - | - | - | - | - | - | - | - | - | - | - | - | - | - |
| **Dehalococcoidia** | - | - | - | - | 1.8 | 3.5 | - | - | - | - | - | - | - | - | - | - |
| **Bathyarchaeia** | - | - | - | - | - | 1.9 | - | - | - | - | - | - | - | - | - | - |
| **Methanomicrobia** | - | - | - | - | - | - | 8.4 | 20.5 | 31.2 | 23.4 | 18.1 | 28.5 | 29.2 | 7.8 | 4.1 | 4.9 |
| **Woesearchaeia** | - | - | - | - | - | - | 2.2 | - | - | - | - | - | - | - | - | - |
| **Campylobacteria** | - | - | - | - | - | - | 34.1 | 21.5 | 2.1 | 2.9 | 2.4 | - | - | 1.6 | 2.3 | 3.3 |
| **Latescibacteria** | - | - | - | - | - | - | - | 2.0 | - | - | - | - | - | 2.2 | 1.8 | - |
| **Odinarchaeia** | - | - | - | - | - | - | - | - | - | - | 1.5 | - | - | 1.5 | - | - |
| **Clostridia** | - | - | - | - | - | - | - | - | - | - | - | - | 1.9 | - | - | - |
| **JS1** | - | - | - | - | - | - | - | - | - | - | - | - | - | 2.4 | 4.4 | 5.0 |
| **Acetothermiia** | - | - | - | - | - | - | - | - | - | - | - | - | - | 1.8 | - | - |
| **Aminicenantia** | - | - | - | - | - | - | - | - | - | - | - | - | - | - | 2.9 | 2.7 |
| **Bacilli** | - | - | - | - | - | - | - | - | - | - | - | - | - | - | - | 2.3 |
| **Calditrichia** | - | - | - | - | - | - | - | - | - | - | - | - | - | - | - | 1.9 |
| **Order [% rel. abundance]** | | | | | | | | | | | | | | | | |
| **Nitrosopumilales** | 2.6 | 1.9 | - | - | - | - | - | - | - | - | - | - | - | - | - | - |
| **Other Archaea** | 1.3 | 2.7 | 2.2 | 3.6 | 4.9 | 6.3 | 4.0 | 3.4 | 4.1 | 2.4 | 4.5 | 3.3 | 3.2 | 7.1 | 7.8 | 8.0 |
| **Other Bacteria** | 34.1 | 39.4 | 36.1 | 37.7 | 43.2 | 39.9 | 26.0 | 25.7 | 29.3 | 36.0 | 36.8 | 21.5 | 33.2 | 41.7 | 36.3 | 38.4 |
| **Desulfobacterales** | 8.6 | 8.8 | 10.6 | 10.4 | 10.6 | 8.2 | 14.5 | 14.9 | 25.9 | 14.6 | 17.8 | 44.4 | 23.6 | 11.2 | 9.4 | 11.0 |
| **Flavobacteriales** | 4.4 | 3.0 | - | - | - | - | 4.7 | 2.4 | - | 2.0 | 2.8 | - | - | - | - | - |
| **Pirellulales** | 4.4 | 3.1 | 3.9 | 3.0 | 3.0 | 2.2 | 1.6 | - | - | 1.6 | 2.0 | - | - | 2.7 | 2.4 | 2.3 |
| **Cellvibrionales** | 4.2 | 2.7 | 2.8 | 3.4 | 2.9 | 3.1 | - | - | - | 2.2 | 2.2 | - | - | 2.8 | 4.3 | 2.0 |
| **Myxococcales** | 3.9 | 4.0 | 4.2 | 4.5 | 4.7 | 4.0 | - | - | - | 3.1 | 2.4 | - | 1.9 | 3.1 | 3.0 | 1.7 |
| **Gammaproteobacteria_Incertae_Sedis** | 3.2 | 1.8 | 3.3 | 3.0 | 3.2 | 1.9 | - | - | - | - | - | - | - | - | - | - |
| **Anaerolineales** | 3.0 | 6.0 | 6.0 | 5.2 | 6.5 | 4.9 | 3.9 | 4.7 | 3.4 | 5.3 | 4.7 | - | 5.1 | 4.7 | 10.2 | 10.1 |
| **Bacteroidales** | 2.8 | 3.2 | 2.7 | 3.4 | 2.7 | 1.8 | 2.8 | 3.2 | 2.5 | 2.4 | 2.6 | 2.3 | 1.9 | 3.9 | 3.6 | 1.9 |
| **NB1-j** | 2.7 | 3.1 | 3.2 | 3.3 | 2.6 | 3.5 | - | - | - | - | - | - | - | 1.9 | 2.0 | 1.8 |
| **Sva0485** | 2.6 | 2.7 | 2.6 | 3.9 | 2.7 | 1.6 | - | - | - | - | - | - | - | - | - | - |
| **Actinomarinales** | 2.5 | 2.7 | 3.2 | 2.1 | 2.5 | 1.8 | - | - | - | 2.1 | - | - | - | - | - | - |
| **Syntrophobacterales** | 2.4 | 2.8 | 3.5 | 3.4 | 2.2 | 4.8 | - | - | - | - | - | - | - | 1.8 | 2.1 | - |
| **BD7-8** | 2.3 | 2.1 | 1.9 | 2.2 | - | 2.0 | - | - | - | - | - | - | - | - | - | - |
| **Oceanospirillales** | 2.2 | - | - | - | - | - | - | - | - | - | - | - | - | - | - | - |
| **Cytophagales** | 2.2 | - | - | - | - | - | - | - | - | - | - | - | - | - | - | - |
| **Steroidobacterales** | 2.1 | 2.3 | 2.2 | 2.1 | - | 2.0 | - | - | - | - | - | - | - | - | - | - |
| **MSBL9** | 2.0 | 3.8 | 3.3 | 5.4 | 4.6 | 5.1 | - | 1.6 | - | - | 2.0 | - | - | 4.1 | 4.4 | 4.6 |
| **Thermoanaerobaculales** | 1.8 | 2.3 | 3.2 | 1.8 | 2.3 | 2.0 | - | - | - | 1.9 | - | - | - | 1.6 | - | - |
| **Microtrichales** | 1.6 | 1.5 | 1.8 | - | - | - | - | - | - | - | - | - | - | - | - | - |
| **Desulfuromonadales** | 1.6 | - | 1.5 | 1.6 | - | - | - | - | - | - | - | - | - | - | - | - |
| **Brocadiales** | 1.5 | - | - | - | - | - | - | - | - | - | - | - | - | - | - | - |
| **B2M28** | - | - | 1.9 | - | 1.5 | 1.8 | - | - | - | - | - | - | - | - | - | - |
| **MSBL5** | - | - | - | - | - | 1.7 | - | - | - | - | - | - | - | - | - | - |
| **Desulfarculales** | - | - | - | - | - | 1.5 | - | - | 1.6 | - | 1.7 | - | - | 2.0 | 3.3 | 3.3 |
| **Methanosarcinales** | - | - | - | - | - | - | 8.4 | 20.5 | 31.2 | 23.4 | 18.1 | 28.5 | 29.2 | 7.7 | 4.1 | 4.7 |
| **Campylobacterales** | - | - | - | - | - | - | 34.1 | 21.5 | 2.1 | 2.9 | 2.4 | - | - | 1.6 | 2.3 | 3.3 |
| **Latescibacterales** | - | - | - | - | - | - | - | 2.0 | - | - | - | - | - | 2.2 | 1.8 | - |
| **Clostridiales** | - | - | - | - | - | - | - | - | - | - | - | - | 1.9 | - | - | - |
| **Aminicenantales** | - | - | - | - | - | - | - | - | - | - | - | - | - | - | 2.9 | 2.7 |
| **Bacillales** | - | - | - | - | - | - | - | - | - | - | - | - | - | - | - | 2.3 |
| **Calditrichales** | - | - | - | - | - | - | - | - | - | - | - | - | - | - | - | 1.9 |
| **Family [% rel. abundance]** | | | | | | | | | | | | | | | | |
| **Nitrosopumilaceae** | 2.6 | 1.9 | - | - | - | - | - | - | - | - | - | - | - | - | - | - |
| **Other Archaea** | 1.3 | 2.7 | 2.2 | 3.6 | 4.9 | 6.3 | 4.2 | 3.7 | 4.2 | 2.6 | 5.2 | 4.2 | 4.6 | 8.3 | 8.8 | 9.6 |
| **Other Bacteria** | 56.2 | 56.4 | 57.8 | 55.6 | 58.9 | 57.7 | 27.4 | 28.5 | 33.9 | 40.6 | 42.6 | 23.8 | 35.5 | 50.4 | 48.4 | 50.9 |
| **Desulfobacteraceae** | 4.5 | 4.9 | 5.9 | 6.2 | 6.5 | 6.7 | 7.4 | 5.2 | 9.1 | 8.8 | 10.3 | 25.0 | 11.3 | 6.9 | 6.5 | 7.9 |
| **Pirellulaceae** | 4.4 | 3.1 | 3.9 | 3.0 | 3.0 | 2.2 | 1.6 | - | - | 1.6 | 2.0 | - | - | 2.7 | 2.4 | 2.3 |
| **Desulfobulbaceae** | 4.1 | 3.9 | 4.7 | 4.2 | 4.0 | - | 7.1 | 9.6 | 16.7 | 5.9 | 7.4 | 19.4 | 12.3 | 4.3 | 2.8 | 3.1 |
| **Flavobacteriaceae** | 3.5 | 2.8 | - | - | - | - | 4.6 | 2.4 | - | 1.9 | 2.8 | - | - | - | - | - |
| **Sandaracinaceae** | 3.2 | 3.0 | 3.4 | 3.5 | 3.8 | 3.5 | - | - | - | 2.9 | 2.2 | - | 1.8 | 2.7 | 2.8 | - |
| **Halieaceae** | 3.1 | 2.4 | 2.4 | 3.0 | 2.5 | 2.9 | - | - | - | 1.9 | 2.0 | - | - | 2.5 | 3.8 | 1.8 |
| **Anaerolineaceae** | 3.0 | 6.0 | 6.0 | 5.2 | 6.5 | 4.9 | 3.9 | 4.7 | 3.4 | 5.3 | 4.7 | - | 5.1 | 4.7 | 10.2 | 10.1 |
| **Syntrophobacteraceae** | 2.4 | 2.8 | 3.5 | 3.3 | 2.2 | 4.8 | - | - | - | - | - | - | - | - | - | - |
| **Bacteroidetes_BD2-2** | 2.2 | 2.7 | 2.5 | 3.1 | 2.3 | 1.6 | 1.9 | 2.1 | - | 1.7 | 1.6 | - | - | 2.2 | 2.5 | - |
| **Cyclobacteriaceae** | 2.1 | - | - | - | - | - | - | - | - | - | - | - | - | - | - | - |
| **Woeseiaceae** | 2.1 | 2.3 | 2.2 | 2.1 | - | 2.0 | - | - | - | - | - | - | - | - | - | - |
| **Kangiellaceae** | 2.0 | - | - | - | - | - | - | - | - | - | - | - | - | - | - | - |
| **Thermoanaerobaculaceae** | 1.8 | 2.3 | 3.2 | 1.8 | 2.3 | 2.0 | - | - | - | 1.9 | - | - | - | 1.6 | - | - |
| **Scalinduaceae** | 1.5 | - | - | - | - | - | - | - | - | - | - | - | - | - | - | - |
| **SG8-4** | - | 2.8 | 2.3 | 3.8 | 3.1 | 4.0 | - | - | - | - | - | - | - | 3.1 | 3.4 | 3.5 |
| **Sva1033** | - | - | - | 1.5 | - | - | - | - | - | - | - | - | - | - | - | - |
| **Desulfarculaceae** | - | - | - | - | - | 1.5 | - | - | 1.6 | - | 1.7 | - | - | 2.0 | 3.3 | 3.3 |
| **ANME-2a-2b** | - | - | - | - | - | - | 4.3 | 5.0 | 2.1 | 4.0 | 5.8 | 4.9 | 1.9 | - | - | - |
| **ANME-2c** | - | - | - | - | - | - | 4.0 | 15.2 | 29.0 | 19.2 | 11.6 | 22.7 | 25.9 | 6.4 | 3.2 | 3.0 |
| **Sulfurovaceae** | - | - | - | - | - | - | 27.3 | 17.3 | - | 1.7 | - | - | - | - | - | 2.5 |
| **Thiovulaceae** | - | - | - | - | - | - | 6.3 | 4.2 | - | - | - | - | - | - | - | - |
| **Latescibacteraceae** | - | - | - | - | - | - | - | 2.0 | - | - | - | - | - | 2.2 | 1.8 | - |
| **GoM-GC232-4463-Bac1** | - | - | - | - | - | - | - | - | - | - | - | - | 1.6 | - | - | - |
| **Calditrichaceae** | - | - | - | - | - | - | - | - | - | - | - | - | - | - | - | 1.9 |
| **Genus [% rel. abundance]** | | | | | | | | | | | | | | | | |
| **Candidatus_Nitrosopumilus** | 2.6 | 1.9 | - | - | - | - | - | - | - | - | - | - | - | - | - | - |
| **Other Archaea** | 1.3 | 2.7 | 2.2 | 3.6 | 4.9 | 6.3 | 12.4 | 23.9 | 35.3 | 24.3 | 22.6 | 31.8 | 32.4 | 14.7 | 11.9 | 12.7 |
| **Other Bacteria** | 85.9 | 88.6 | 85.4 | 85.6 | 89.7 | 85.5 | 46.4 | 52.7 | 57.6 | 65.9 | 68.9 | 45.2 | 58.1 | 79.2 | 78.7 | 75.7 |
| **Sva0081_sediment_group** | 3.0 | 2.6 | 3.2 | 3.6 | 3.6 | 4.0 | - | - | - | - | - | - | - | - | - | - |
| **Woeseia** | 2.1 | 2.3 | 2.2 | 2.1 | - | 2.0 | - | - | - | - | - | - | - | - | - | - |
| **Halioglobus** | 1.8 | - | 1.6 | 1.6 | - | - | - | - | - | - | - | - | - | - | 2.0 | - |
| **Pir4_lineage** | 1.7 | - | 1.7 | 1.5 | - | - | - | - | - | - | - | - | - | - | - | - |
| **Candidatus_Scalindua** | 1.5 | - | - | - | - | - | - | - | - | - | - | - | - | - | - | - |
| **SEEP-SRB1** | - | 1.8 | 2.0 | 1.9 | 1.8 | 2.2 | 2.0 | 1.8 | 5.6 | 4.8 | 6.9 | 23.0 | 9.5 | 4.1 | 4.1 | 5.9 |
| **Subgroup_23** | - | - | 1.8 | - | - | - | - | - | - | - | - | - | - | - | - | - |
| **Sulfurovum** | - | - | - | - | - | - | 27.3 | 17.3 | - | 1.7 | - | - | - | - | - | 2.5 |
| **Sulfurimonas** | - | - | - | - | - | - | 6.3 | 4.2 | - | - | - | - | - | - | - | - |
| **Desulfobacula** | - | - | - | - | - | - | 2.8 | - | - | - | - | - | - | - | - | - |
| **Desulfocapsa** | - | - | - | - | - | - | 2.8 | - | - | - | - | - | - | - | - | - |
| **Desulfatiglans** | - | - | - | - | - | - | - | - | 1.6 | - | 1.6 | - | - | 2.0 | 3.2 | 3.2 |
| **ANME-2b** | - | - | - | - | - | - | - | - | - | 1.5 | - | - | - | - | - | - |
| **Desulfococcus** | - | - | - | - | - | - | - | - | - | 1.7 | - | - | - | - | - | - |

Supplementary Table 3: Concentrations of lipids of the cold seep (MUC09-3) and the reference core (MUC08-4).

Concentrations in mg L-1 of fatty acids, alcohols and hydrocarbons quantified based on internal standards of known concentration added to the sample prior to extraction. FA: fatty acid, MAGE: monoalkyl glycerol ether. DAGE: dialkyl glycerol ether. OH: Hydroxy. mg L-1 was converted from gdw-1 with the porosity (see table S1).

| **ID** | 335 | 336 | 337 | 338 | 339 | 340 | 341 | 342 | 343 | 344 | 345 | 276 | 278 | 280 | 282 | 284 |
| --- | --- | --- | --- | --- | --- | --- | --- | --- | --- | --- | --- | --- | --- | --- | --- | --- |
| **Depths [cmbsf]** | 1.5 | 4.5 | 7.5 | 10.5 | 13.5 | 16.5 | 19.5 | 22.5 | 25.5 | 28.5 | 31.5 | 6 | 16 | 26 | 36 | 46.5 |
| **Type** | **Cold seep (MUC09-3)** | | | | | | | | | | | **Reference (MUC08-4)** | | | | |
| **Concentration [mg L-1]** | | | | | | | | | | | | | | | | |
| **Crocetane** | 0.005 | 0.018 | 0.083 | 0.159 | 0.176 | 0.355 | 0.994 | 0.459 | 0.066 | 0.074 | 0.059 |  |  |  |  |  |
| **PMI** | 0.019 | 0.020 | 0.020 | 0.031 | 0.059 | 0.083 | 0.119 | 0.092 | 0.079 | 0.084 | 0.072 |  |  |  |  |  |
| **Squalene** | 0.010 | 0.022 | 0.020 | 0.026 | 0.038 | 0.098 | 0.116 | 0.070 | 0.067 | 0.086 | 0.078 | 0.033 | 0.058 | 0.075 | 0.062 | 0.033 |
| **Archaeol** | 0.077 | 0.148 | 0.344 | 0.304 | 0.321 | 0.289 | 0.392 | 0.267 | 0.111 | 0.128 | 0.100 |  |  |  |  |  |
| **Cholesterol** | 0.533 | 0.630 | 0.534 | 0.459 | 0.464 | 0.262 | 0.313 | 0.330 | 0.365 | 0.347 | 0.231 | 0.361 | 0.193 | 0.231 | 0.208 | 0.361 |
| **DAGE C32:2** | 0.147 | 0.218 | 0.921 | 0.941 | 0.696 | 0.582 | 0.894 | 0.424 | 0.139 | 0.152 | 0.158 |  |  |  |  |  |
| **Dinosterol** | 0.943 | 0.456 | 0.482 | 0.438 | 0.501 | 0.526 | 0.446 | 0.482 | 0.475 | 0.420 | 0.481 | 0.571 | 0.277 | 0.291 | 0.245 | 0.571 |
| **MAGE C14:0** | 0.052 | 0.038 | 0.077 | 0.087 | 0.078 | 0.057 | 0.099 | 0.066 | 0.031 | 0.035 | 0.051 |  |  |  |  |  |
| **MAGE C16:0** | 0.041 | 0.060 | 0.146 | 0.163 | 0.130 | 0.096 | 0.167 | 0.101 | 0.040 | 0.045 | 0.058 | 0.026 | 0.017 | 0.020 | 0.021 | 0.026 |
| **MAGE C16:1ω5c** | 0.043 | 0.059 | 0.145 | 0.174 | 0.133 | 0.079 | 0.161 | 0.094 | 0.039 | 0.044 | 0.053 |  |  |  |  |  |
| **MAGE C16:1ω7c** |  | 0.038 | 0.048 | 0.056 | 0.045 |  | 0.051 | 0.043 | 0.036 | 0.039 |  |  |  |  |  |  |
| **MAGE sn2-Phy** | 0.035 | 0.038 | 0.061 | 0.063 | 0.096 | 0.067 | 0.050 | 0.045 | 0.036 | 0.039 | 0.046 |  |  |  |  |  |
| **OH-C14:0** | 0.025 | 0.014 | 0.016 | 0.016 | 0.017 | 0.021 | 0.018 | 0.019 | 0.021 | 0.021 | 0.020 | 0.025 | 0.022 | 0.027 | 0.028 | 0.025 |
| **OH-C16:0** | 0.156 | 0.088 | 0.152 | 0.145 | 0.118 | 0.120 | 0.156 | 0.138 | 0.075 | 0.080 | 0.068 | 0.086 | 0.057 | 0.070 | 0.067 | 0.086 |
| **OH-C16:1ω5c** | 0.045 | 0.045 | 0.232 | 0.208 | 0.133 | 0.096 | 0.181 | 0.133 | 0.034 | 0.039 | 0.027 |  |  |  |  |  |
| **OH-C16:1ω7c** | 0.055 | 0.049 | 0.191 | 0.185 | 0.124 | 0.082 | 0.167 | 0.120 | 0.032 | 0.039 | 0.029 |  |  |  |  |  |
| **OH-C18:0** | 0.059 | 0.060 | 0.061 | 0.091 | 0.070 | 0.046 | 0.064 | 0.065 | 0.082 | 0.082 | 0.047 | 0.045 | 0.046 | 0.058 | 0.066 | 0.045 |
| **OH-C20:0** | 0.074 | 0.061 | 0.065 | 0.065 | 0.068 | 0.057 | 0.071 | 0.073 | 0.069 | 0.074 | 0.065 | 0.062 | 0.045 | 0.059 | 0.065 | 0.062 |
| **OH-C22:0** | 0.191 | 0.162 | 0.151 | 0.147 | 0.172 | 0.148 | 0.167 | 0.188 | 0.176 | 0.178 | 0.154 | 0.168 | 0.112 | 0.157 | 0.163 | 0.168 |
| **OH-C24:0** |  | 0.041 | 0.056 | 0.053 | 0.046 |  | 0.041 | 0.045 | 0.046 | 0.048 |  | 0.000 | 0.027 | 0.035 | 0.035 | 0.000 |
| **OH-C26:0** | 0.065 | 0.157 | 0.153 | 0.154 | 0.162 | 0.050 | 0.145 | 0.163 | 0.166 | 0.163 | 0.058 | 0.053 | 0.109 | 0.151 | 0.156 | 0.053 |
| **Phytol** | 0.918 | 0.680 | 0.562 | 0.537 | 0.510 | 0.468 | 0.400 | 0.443 | 0.425 | 0.460 | 0.399 | 0.515 | 0.294 | 0.394 | 0.389 | 0.515 |
| **Sitosterol** | 0.855 | 0.208 | 0.201 | 0.220 | 0.206 | 0.356 | 0.163 | 0.169 | 0.182 | 0.176 | 0.315 | 0.468 | 0.104 | 0.117 | 0.108 | 0.468 |
| **sn2-OH-Archaeol** | 0.084 | 0.153 | 0.419 | 0.389 | 0.475 | 0.418 | 0.489 | 0.273 | 0.101 | 0.125 | 0.107 |  |  |  |  |  |
| **FA C14:0** | 0.905 | 0.692 | 0.726 | 0.605 | 0.703 | 0.468 | 0.534 | 0.483 | 0.378 | 0.355 | 0.309 |  | 0.167 | 0.256 | 0.226 | 0.322 |
| **FA C15:0** | 0.131 | 0.139 | 0.132 | 0.122 | 0.151 | 0.112 | 0.135 | 0.125 | 0.091 | 0.089 | 0.079 | 0.322 | 0.060 | 0.086 | 0.056 | 0.096 |
| **FA C16:0** | 1.439 | 1.174 | 1.089 | 0.978 | 1.040 | 0.873 | 0.879 | 0.808 | 0.757 | 0.764 | 0.588 | 0.096 | 0.444 | 0.684 | 1.298 | 0.762 |
| **FA C16:1ω5c** | 0.928 | 0.633 | 1.123 | 1.178 | 1.544 | 0.884 | 1.184 | 0.932 | 0.357 | 0.295 | 0.215 | 0.762 | 0.087 | 0.144 | 0.083 | 0.176 |
| **FA C16:1ω7c** | 2.090 | 1.287 | 0.909 | 0.543 | 0.453 | 0.229 | 0.305 | 0.275 | 0.187 | 0.173 | 0.134 | 0.176 | 0.231 | 0.370 | 0.211 | 0.501 |
| **FA C17:0** | 0.087 | 0.067 | 0.080 | 0.086 | 0.105 | 0.088 | 0.112 | 0.104 | 0.065 | 0.066 | 0.059 | 0.501 | 0.045 | 0.071 | 0.060 | 0.071 |
| **FA C17:1ω8c** | 0.097 | 0.065 | 0.087 | 0.090 | 0.114 | 0.080 | 0.102 | 0.088 | 0.048 | 0.048 | 0.040 | 0.071 | 0.042 | 0.067 | 0.040 | 0.075 |
| **FA C18:0** | 0.215 | 0.211 | 0.134 | 0.124 | 0.122 | 0.248 | 0.118 | 0.126 | 0.137 | 0.133 | 0.105 | 0.075 | 0.081 | 0.112 | 1.076 | 0.121 |
| **FA C18:1ω7c** | 0.929 | 0.504 | 0.391 | 0.294 | 0.260 | 0.214 | 0.199 | 0.193 | 0.167 | 0.155 | 0.120 | 0.121 | 0.198 | 0.305 | 0.397 | 0.354 |
| **FA C18:1ω9c** | 0.437 | 0.275 | 0.222 | 0.188 | 0.192 | 0.223 | 0.144 | 0.148 | 0.116 | 0.126 | 0.100 | 0.354 | 0.136 | 0.202 | 0.616 | 0.238 |
| **FA C20:0** | 0.123 | 0.098 | 0.098 | 0.099 | 0.098 | 0.088 | 0.103 | 0.111 | 0.105 | 0.110 | 0.106 | 0.238 | 0.067 | 0.093 | 0.152 | 0.089 |
| **FA C22:0** | 0.196 | 0.175 | 0.160 | 0.176 | 0.202 | 0.169 | 0.239 | 0.262 | 0.257 | 0.258 | 0.267 | 0.089 | 0.157 | 0.217 | 0.176 | 0.193 |
| **FA C24:0** | 0.251 | 0.236 | 0.181 | 0.202 | 0.289 | 0.224 | 0.332 | 0.361 | 0.356 | 0.368 | 0.379 | 0.193 | 0.209 | 0.283 | 0.214 | 0.256 |
| **FA C26:0** | 0.086 | 0.079 | 0.074 | 0.082 | 0.092 | 0.070 | 0.099 | 0.111 | 0.101 | 0.111 | 0.116 | 0.256 | 0.063 | 0.082 | 0.050 | 0.079 |
| **FA aiC15:0** | 0.257 | 0.184 | 0.311 | 0.231 | 0.248 | 0.187 | 0.262 | 0.199 | 0.139 | 0.141 | 0.105 | 0.079 | 0.080 | 0.156 | 0.090 | 0.144 |
| **FA aiC17:0** | 0.083 | 0.057 | 0.070 | 0.067 | 0.068 | 0.050 | 0.064 | 0.060 | 0.046 | 0.048 | 0.041 | 0.144 | 0.039 | 0.060 | 0.040 | 0.064 |
| **FA cyC17:0ω5,6** | 0.053 | 0.041 | 0.076 | 0.108 | 0.158 | 0.146 | 0.227 | 0.184 | 0.051 | 0.055 | 0.054 | 0.064 |  |  |  |  |
| **FA iC15:0** | 0.366 | 0.272 | 0.429 | 0.329 | 0.398 | 0.301 | 0.411 | 0.353 | 0.278 | 0.258 | 0.182 | 0.333 | 0.190 | 0.424 | 0.229 | 0.333 |
| **FA iC16:0** | 0.069 | 0.054 | 0.058 | 0.054 | 0.064 | 0.051 | 0.072 | 0.063 | 0.043 | 0.046 | 0.038 | 0.061 | 0.036 | 0.058 | 0.036 | 0.061 |
| **FA iC16:1** | 0.030 | 0.026 | 0.036 | 0.040 | 0.051 | 0.042 | 0.064 | 0.053 | 0.031 | 0.035 | 0.031 | 0.036 | 0.024 | 0.037 | 0.025 | 0.036 |
| **FA iC17:0** | 0.087 | 0.061 | 0.074 | 0.069 | 0.071 | 0.054 | 0.070 | 0.069 | 0.053 | 0.057 | 0.048 | 0.079 | 0.047 | 0.086 | 0.052 | 0.079 |

Supplementary Table 4: Stable carbon isotope compositions of lipids in the cold seep (MUC09-3) and the reference core (MUC08-4).

δ13C values of fatty acids, alcohols and hydrocarbons were quantified based on internal standards of known concentration added to the sample prior to extraction. FA: fatty acid, MAGE: monoalkyl glycerol ether. DAGE: dialkyl glycerol ether. OH: Hydroxy.

| **ID** | 335 | 336 | 337 | 338 | 339 | 340 | 341 | 342 | 343 | 344 | 345 | 276 | 278 | 280 | 282 | 284 |
| --- | --- | --- | --- | --- | --- | --- | --- | --- | --- | --- | --- | --- | --- | --- | --- | --- |
| **Depths [cmbsf]** | 1.5 | 4.5 | 7.5 | 10.5 | 13.5 | 16.5 | 19.5 | 22.5 | 25.5 | 28.5 | 31.5 | 6 | 16 | 26 | 36 | 46.5 |
| **Type** | **Cold seep (MUC09-3)** | | | | | | | | | | | **Reference (MUC08-4)** | | | | |
| **δ13C [‰]** | | | | | | | | | | | | | | | | |
| **Crocetane** |  | -101 | -104 | -105 | -104 | -100 | -103 | -99 | -83 | -92 | -92 |  |  |  |  |  |
| **PMI** | -23 | -23 | -22 | -20 | -22 | -25 | -20 | -21 | -23 | -24 | -25 |  |  |  |  |  |
| **Squalene** | -23 | -23 | -23 | -23 | -24 | -24 | -22 | -23 | -22 | -23 | -25 | -22 | -22 | -22 | -22 | -25 |
| **Archaeol** | -67 | -82 | -93 | -93 | -92 | -94 | -94 | -94 | -74 | -75 | -78 |  |  |  |  |  |
| **Cholesterol** | -27 | -25 | -24 | -25 | -26 | -27 | -27 | -28 | -27 | -27 | -28 | -27 | -28 | -28 | -28 | -29 |
| **DAGE C32:2** | -69 | -69 | -84 | -83 | -82 | -82 | -82 | -83 | -73 | -73 | -72 |  |  |  |  |  |
| **Dinosterol** | -24 | -24 | -24 | -23 | -24 | -24 | -25 | -25 | -25 | -25 | -25 | -27 | -26 | -26 | -27 | -27 |
| **MAGE C14:0** | -31 | -40 | -68 | -62 | -63 | -59 | -67 | -76 | -66 | -56 | -39 |  |  |  |  |  |
| **MAGE C16:0** | -36 | -40 | -58 | -60 | -62 | -60 | -61 | -61 | -47 | -47 | -49 | -33 | -36 | -40 | -38 | -35 |
| **MAGE C16:1ω5c** | -51 | -54 | -69 | -68 | -66 | -67 | -67 | -66 | -59 | -64 | -68 |  |  |  |  |  |
| **MAGE C16:1ω7c** | -47 | -53 | -70 | -70 | -68 | -69 | -70 | -69 | -61 | -62 | -66 |  |  |  |  |  |
| **MAGE sn2-Phy** | -60 | -83 | -85 | -89 | -91 | -93 | -87 | -89 | -81 | -80 | -75 |  |  |  |  |  |
| **OH-C14:0** | -31 | -32 | -58 | -56 | -51 | -52 | -63 | -58 | -38 | -36 | -37 | -26 | -31 | -29 | -28 | -32 |
| **OH-C16:0** | -27 | -34 | -64 | -62 | -54 | -58 | -65 | -62 | -36 | -36 | -31 | -26 | -30 | -29 | -30 | -30 |
| **OH-C16:1ω5c** | -44 | -64 | -86 | -82 | -80 | -80 | -81 | -80 | -69 | -68 | -67 |  |  |  |  |  |
| **OH-C16:1ω7c** | -31 | -54 | -84 | -82 | -79 | -80 | -83 | -84 | -73 | -73 | -72 |  |  |  |  |  |
| **OH-C18:0** | -35 | -29 | -30 | -29 | -29 | -28 | -26 | -30 | -30 | -30 | -28 | -31 | -30 | -31 | -32 | -30 |
| **OH-C20:0** | -31 | -29 | -32 | -32 | -32 | -32 | -33 | -33 | -32 | -31 | -31 | -31 | -32 | -32 | -33 | -34 |
| **OH-C22:0** | -31 | -27 | -30 | -30 | -29 | -33 | -30 | -33 | -31 | -30 | -27 | -30 | -31 | -31 | -31 | -33 |
| **OH-C24:0** |  | -30 | -31 | -30 | -30 | -31 | -31 | -33 | -33 | -30 |  |  | -32 | -33 | -33 | -33 |
| **OH-C26:0** | -30 | -30 | -30 | -30 | -30 | -32 | -31 | -33 | -32 | -31 | -28 | -29 | -33 | -32 | -33 | -33 |
| **Phytol** | -27 | -26 | -27 | -25 | -26 | -28 | -26 | -27 | -27 | -26 | -27 | -27 | -28 | -28 | -29 | -29 |
| **Sitosterol** | -24 | -24 | -24 | -23 | -24 | -25 | -26 | -27 | -25 | -25 | -24 | -24 | -26 | -26 | -27 | -28 |
| **sn2-OH-Archaeol** | -70 | -89 | -102 | -102 | -102 | -100 | -99 | -102 | -88 | -92 | -89 |  |  |  |  |  |
| **FA C14:0** | -25 | -30 | -42 | -45 | -42 | -43 | -45 | -44 | -35 | -36 | -39 | -33 | -32 | -32 | -34 | -31 |
| **FA C15:0** | -27 | -28 | -32 | -33 | -38 | -38 | -33 | -35 | -30 | -29 | -31 | -30 | -27 | -29 | -31 | -30 |
| **FA C16:0** | -25 | -27 | -36 | -37 | -36 | -36 | -38 | -38 | -32 | -32 | -33 | -31 | -31 | -32 | -34 | -31 |
| **FA C16:1ω5c** | -36 | -41 | -63 | -67 | -67 | -68 | -66 | -67 | -60 | -60 | -60 | -31 | -33 | -34 | -35 | -34 |
| **FA C16:1ω7c** | -22 | -24 | -36 | -45 | -44 | -45 | -50 | -47 | -38 | -37 | -41 | -35 | -36 | -36 | -36 | -34 |
| **FA C17:0** | -44 | -28 | -30 | -45 | -47 | -49 | -51 | -50 | -39 | -39 | -44 |  |  |  |  |  |
| **FA C17:1ω8c** | -28 | -27 | -36 | -39 | -42 | -46 | -46 | -43 | -31 | -31 | -35 | -32 | -31 | -30 | -32 | -30 |
| **FA C18:0** | -29 | -32 | -48 | -50 | -55 | -57 | -49 | -57 | -44 | -44 | -35 | -29 | -30 | -27 | -29 | -29 |
| **FA C18:1ω7c** | -27 | -28 | -37 | -32 | -32 | -35 | -38 | -36 | -28 | -24 | -28 | -27 | -30 | -31 | -29 | -31 |
| **FA C18:1ω9c** | -21 | -23 | -30 | -25 | -29 | -30 | -28 | -30 | -29 | -30 | -28 | -30 | -31 | -30 | -34 | -30 |
| **FA C20:0** | -19 | -23 | -31 | -32 | -32 | -32 | -34 | -34 | -32 | -32 | -33 | -31 | -31 | -32 | -31 | -31 |
| **FA C22:0** | -24 | -27 | -31 | -28 | -27 | -29 | -30 | -31 | -29 | -30 | -30 | -30 | -30 | -31 | -33 | -32 |
| **FA C24:0** | -31 | -32 | -30 | -29 | -31 | -32 | -31 | -31 | -31 | -29 | -30 | -34 | -34 | -32 | -34 | -32 |
| **FA C26:0** | -26 | -27 | -28 | -23 | -27 | -27 | -24 | -27 | -27 | -24 | -24 | -29 | -29 | -30 | -30 | -26 |
| **FA aiC15:0** | -23 | -24 | -26 | -22 | -26 | -31 | -29 | -30 | -30 | -24 | -36 | -25 | -25 | -26 | -28 | -23 |
| **FA aiC17:0** | -28 | -29 | -29 | -25 | -26 | -28 | -27 | -28 | -28 | -28 | -29 | -30 | -29 | -28 | -30 | -29 |
| **FA cyC17:0ω5,6** | -28 | -29 | -27 | -26 | -26 | -28 | -26 | -28 | -28 | -29 | -29 | -30 | -29 | -30 | -31 | -29 |
| **FA iC15:0** | -29 | -29 | -29 | -27 | -27 | -29 | -28 | -29 | -29 | -30 | -30 | -33 | -31 | -31 | -32 | -30 |
| **FA iC16:0** | -31 | -32 | -31 | -30 | -31 | -32 | -30 | -31 | -33 | -33 | -31 | -34 | -33 | -33 | -33 | -33 |
| **FA iC16:1** | -31 | -34 | -33 | -32 | -34 | -32 | -31 | -33 | -35 | -33 | -32 | -36 | -34 | -34 | -37 | -31 |
| **FA iC17:0** | -28 | -33 | -41 | -39 | -36 | -39 | -38 | -39 | -32 | -33 | -32 | -29 | -26 | -32 | -33 | -27 |

Supplementary Table 5: Concentrations and δ13C values of the disaccharides trehalose and sucrose of cold seep (MUC09-3) and the reference core (MUC08-4).

Concentrations in mg L-1 were converted from gdw-1 with porosity. δ13C values in‰ and vs. VPDB.

|  |  |  |  | **Concentrations [mg L-1]** | | | | **Carbon isotope composition δ13C [‰]** | | | |
| --- | --- | --- | --- | --- | --- | --- | --- | --- | --- | --- | --- |
|  |  |  |  | **Solid phase** | | **Porewater** | | **Solid phase** | | **Porewater** | |
| **Core** | **ID** | **type** | **Depth [cmbsf]** | **Trehalose** | **Sucrose** | **Trehalose** | **Sucrose** | **Trehalose** | **Sucrose** | **Trehalose** | **Sucrose** |
| **MUC08-4** | **275** | **Reference** | 1 | 5.4 | 0.2 | 0.1 | - | -30 | -28 | -31 | -29 |
| **276** | 6 | 3.2 | 0.1 | 0.1 | - |  |  |  |  |
| **278** | 16 | 1.4 | - | - | - | -27 | -29 |  |  |
| **280** | 26 | 1.6 | - | - | - |  |  |  |  |
| **282** | 36 | 1.1 | 0.1 | - | - |  |  |  |  |
| **282** | 36 | 1.2 | - | - | - | -30 | -29 |  |  |
| **MUC09-3** | **335** | **Cold seep** | 1.5 | 3.1 | 0.2 | 0.5 | - | -58 | -44 |  |  |
| **336** | 4.5 | 2.0 | 0.1 | 0.1 | 0.1 | -61 | -52 |  |  |
| **337** | 7.5 | 9.2 | 0.5 | 0.3 | 0.2 | -77 | -61 | -65 | -67 |
| **338** | 10.5 | 12.5 | 0.7 | 0.1 | 0.1 | -78 | -64 |  | -69 |
| **339** | 13.5 | 11.0 | 0.9 | 0.1 | 0.2 | -74 | -63 | -66 | -66 |
| **340** | 16.5 | 10.4 | 0.5 | 0.1 | 0.2 | -74 | -64 |  | -64 |
| **341** | 19.5 | 17.7 | 1.1 | 0.2 | 0.5 | -74 | -63 | -68 | -69 |
| **342** | 22.5 | 15.7 | 1.0 | 0.2 | 1.0 | -77 | -66 | -68 | -71 |
| **343** | 25.5 | 2.3 | 0.1 | 0.1 | 0.1 | -69 | -54 |  |  |
| **344** | 28.5 | 2.0 | - | 0.1 | 0.1 | -69 | -46 |  |  |
| **345** | 31.5 | 1.9 | - | - | - | -61 | -41 |  |  |

### Supplementary Figures


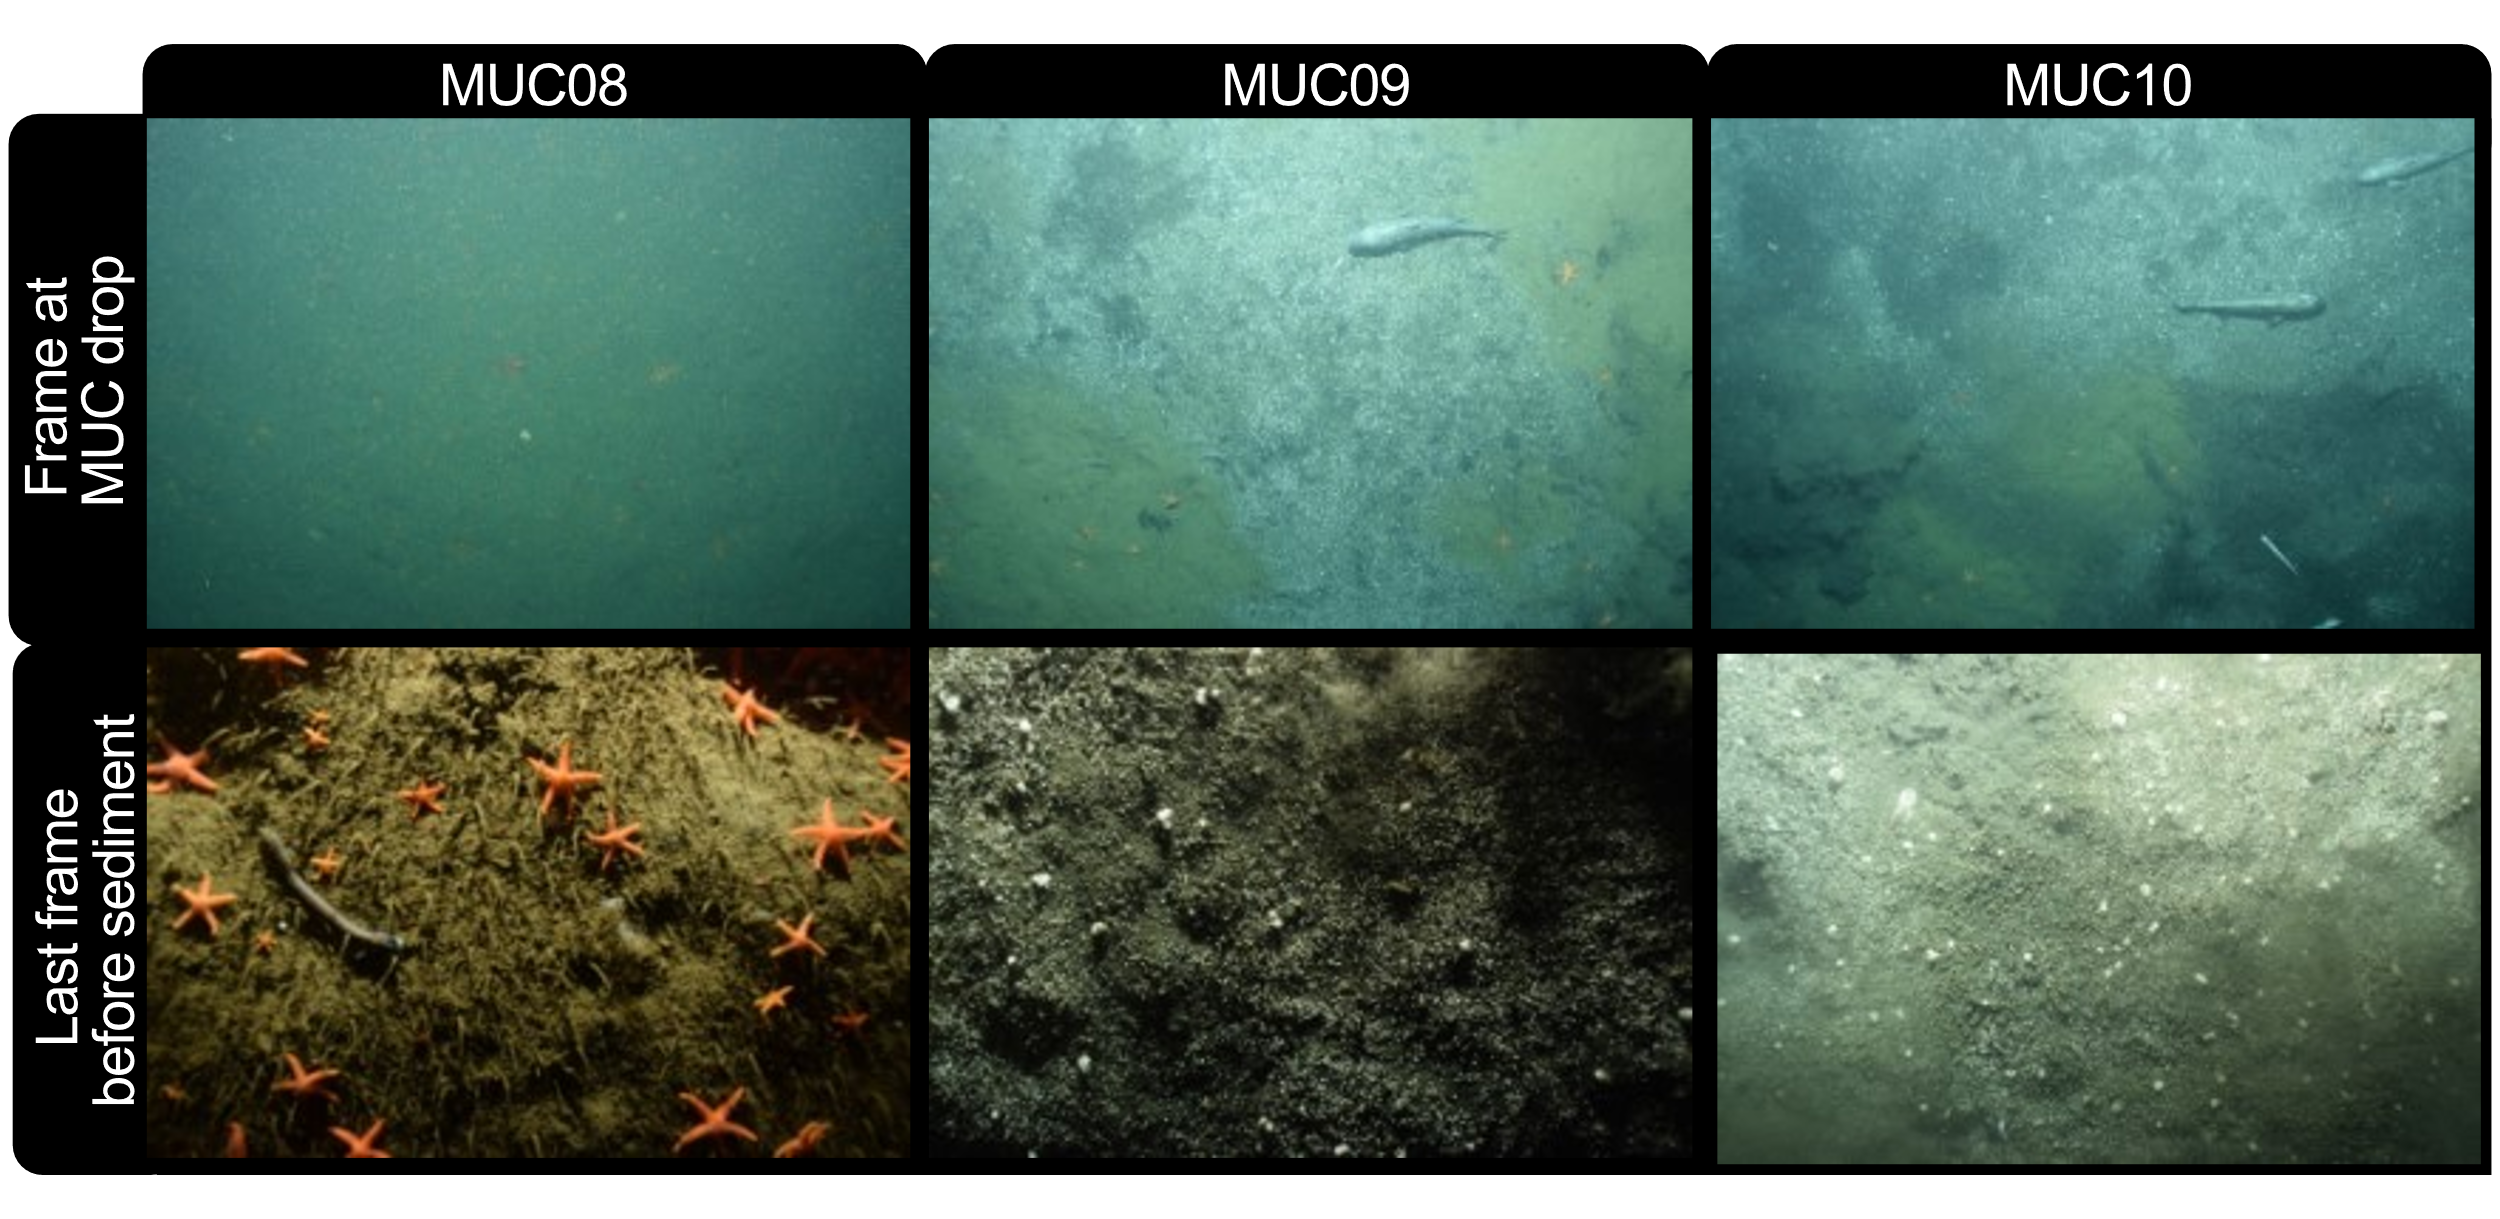


*Supplementary Fig. 1. Multicorer photos taken every seven seconds during deployments of MUC08, 09, and 10 in the Astoria Canyon. Upper column is the last frame when MUC was dropped into sediment and lower column is the last frame before hitting the sediment.*

Supplementary Fig. 2. Porewater concentration profiles of dissolved inorganic carbon (DIC) and sulfate from the MUC09 multicores at site H1866 in Astoria Canyon.


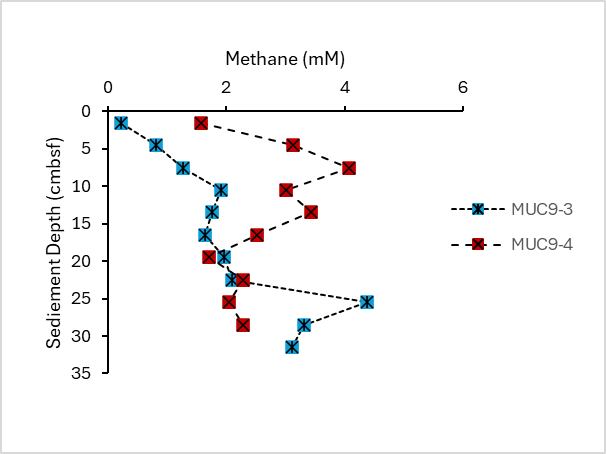


Supplementary Fig. 3. Porewater methane from the MUC09 multicores at site H1866 in Astoria Canyon. For MUC09-2, intended for DOC analysis, we did not measure CH4 concentrations.


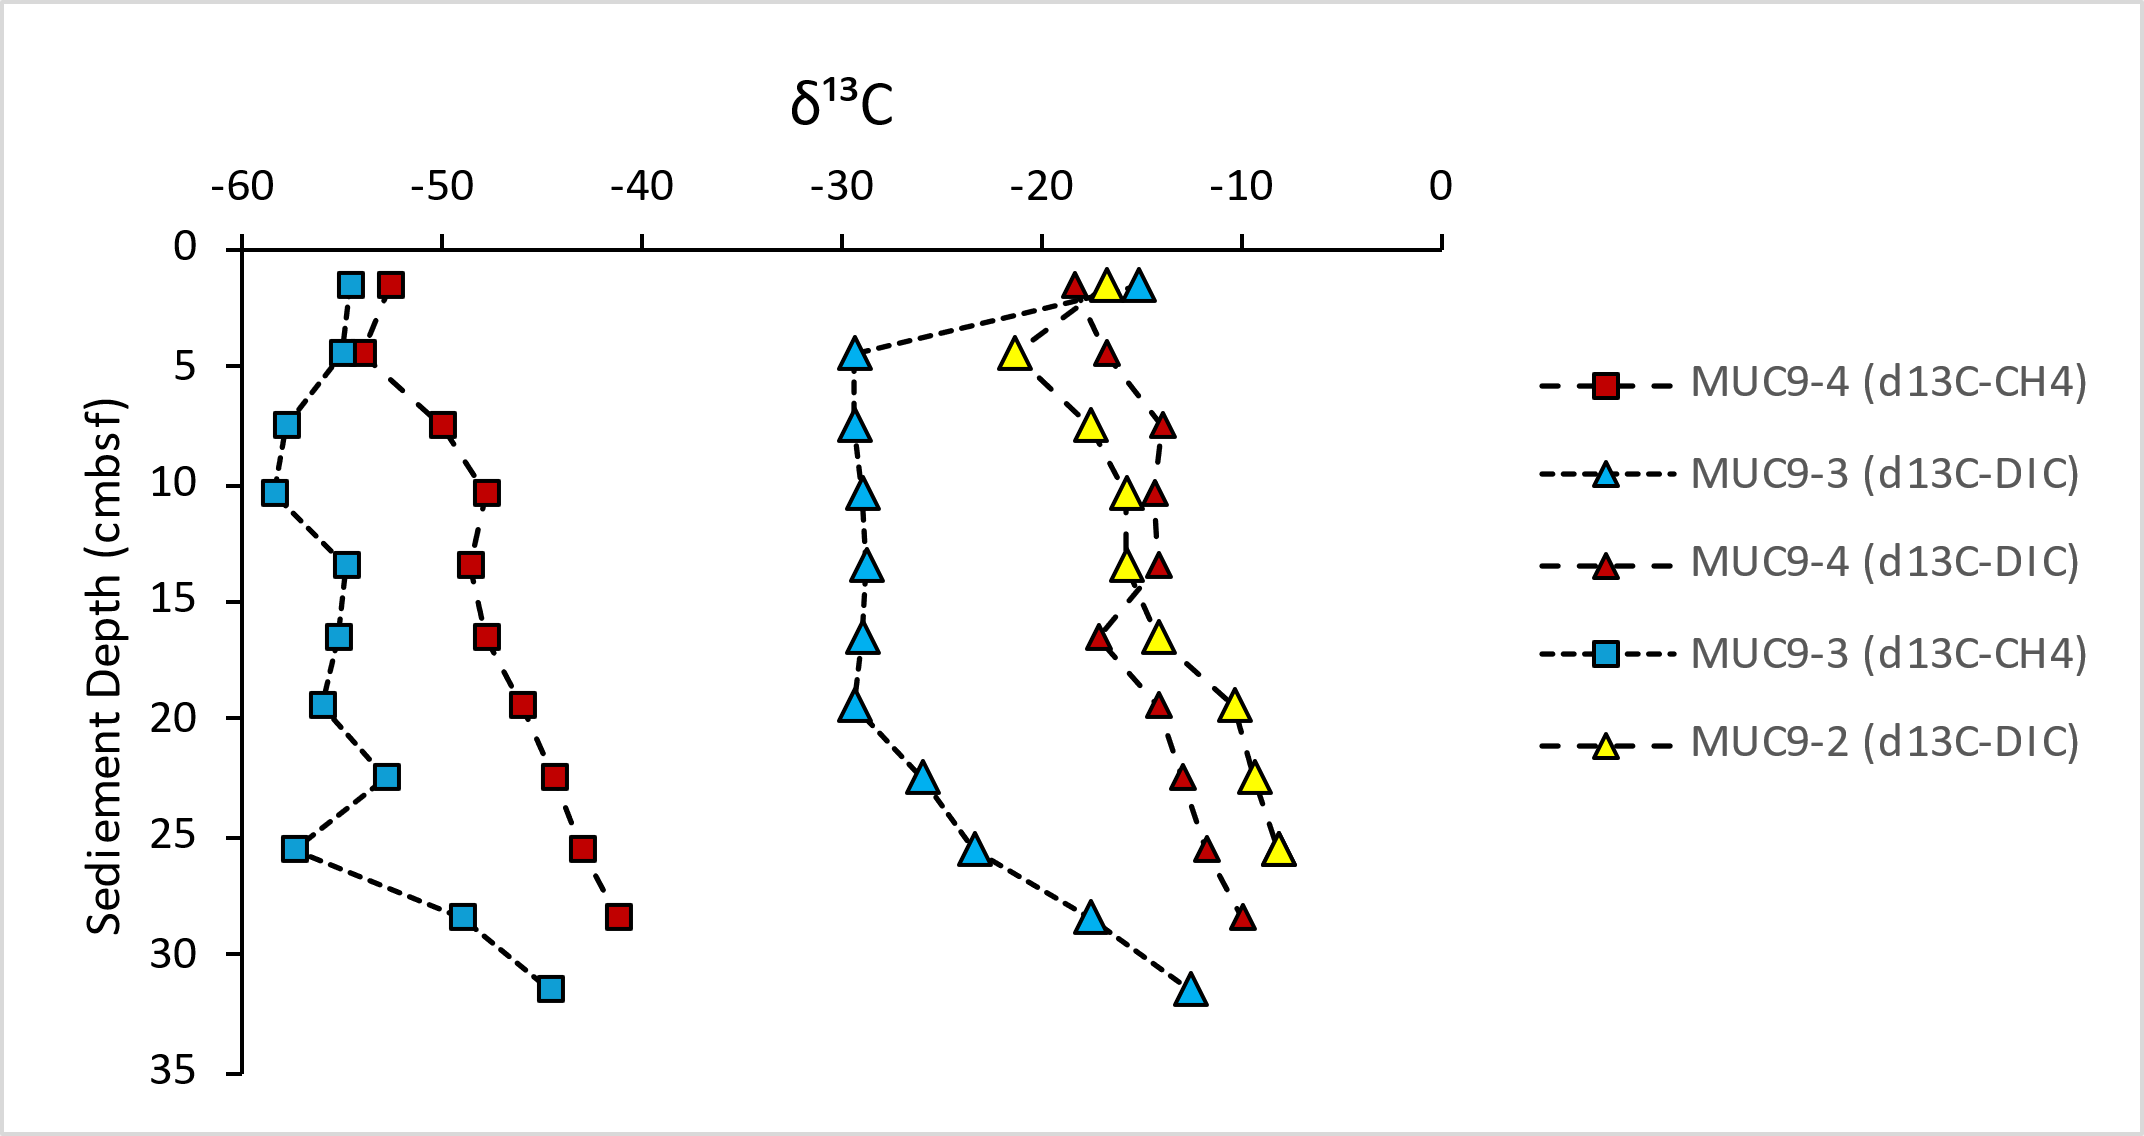


Supplementary Fig 4. Porewater 13C profiles of dissolved inorganic carbon (DIC) and methane from the MUC09 multicores at site H1866 in Astoria Canyon. For MUC09-2, intended for DOC analysis, we did not measure CH4 concentrations and the corresponding 13C values.


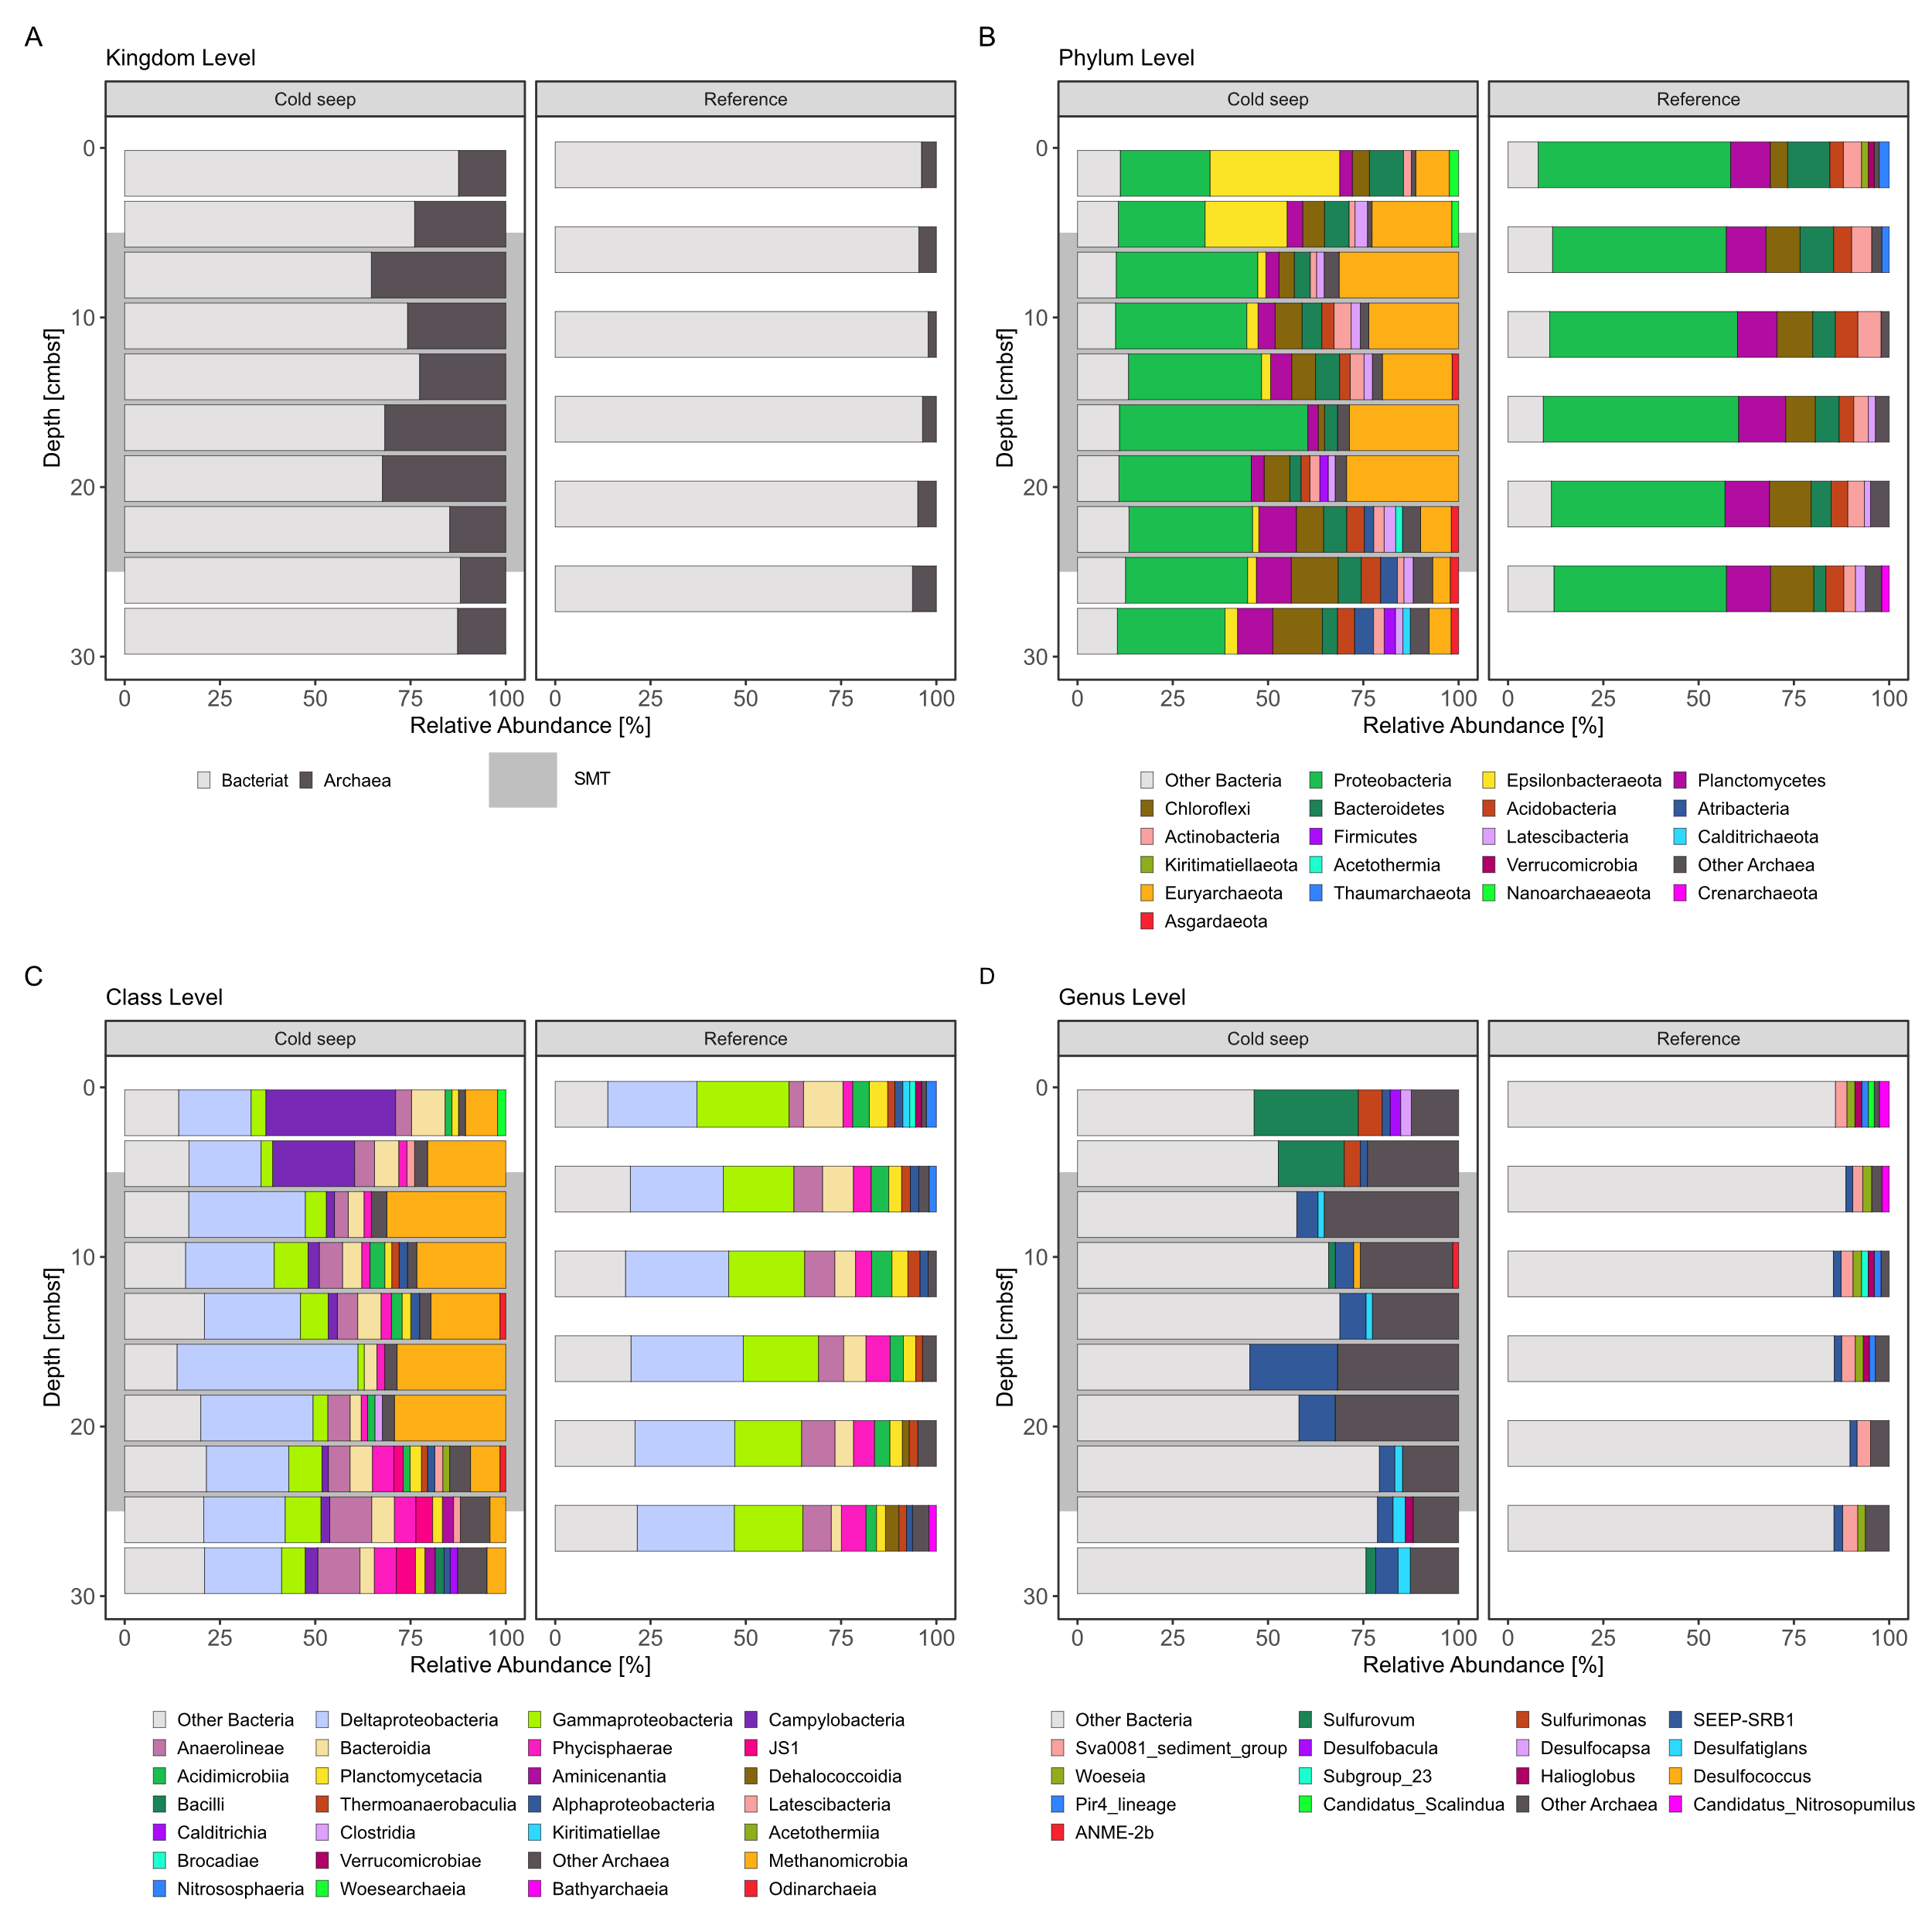


Supplementary Fig. 5: Relative 16SrRNA gene abundance data of microbial taxa in the cold seep (MUC09-4) and the reference core (MUC08-1) from the Astoria Canyon.

Stacked bar plots show 16S rRNA gene amplicon data of Kingdom A), Phylum B), Class C), Order D), Family E), and Genus F) level across sediment depths, with the cold seep (left panels) and the reference core (right panels). Each color represents a distinct bacterial taxon. Highlighted taxa lineages with elevated relative abundance in the cold seep environment, particularly in the SMTZ (grey zone).


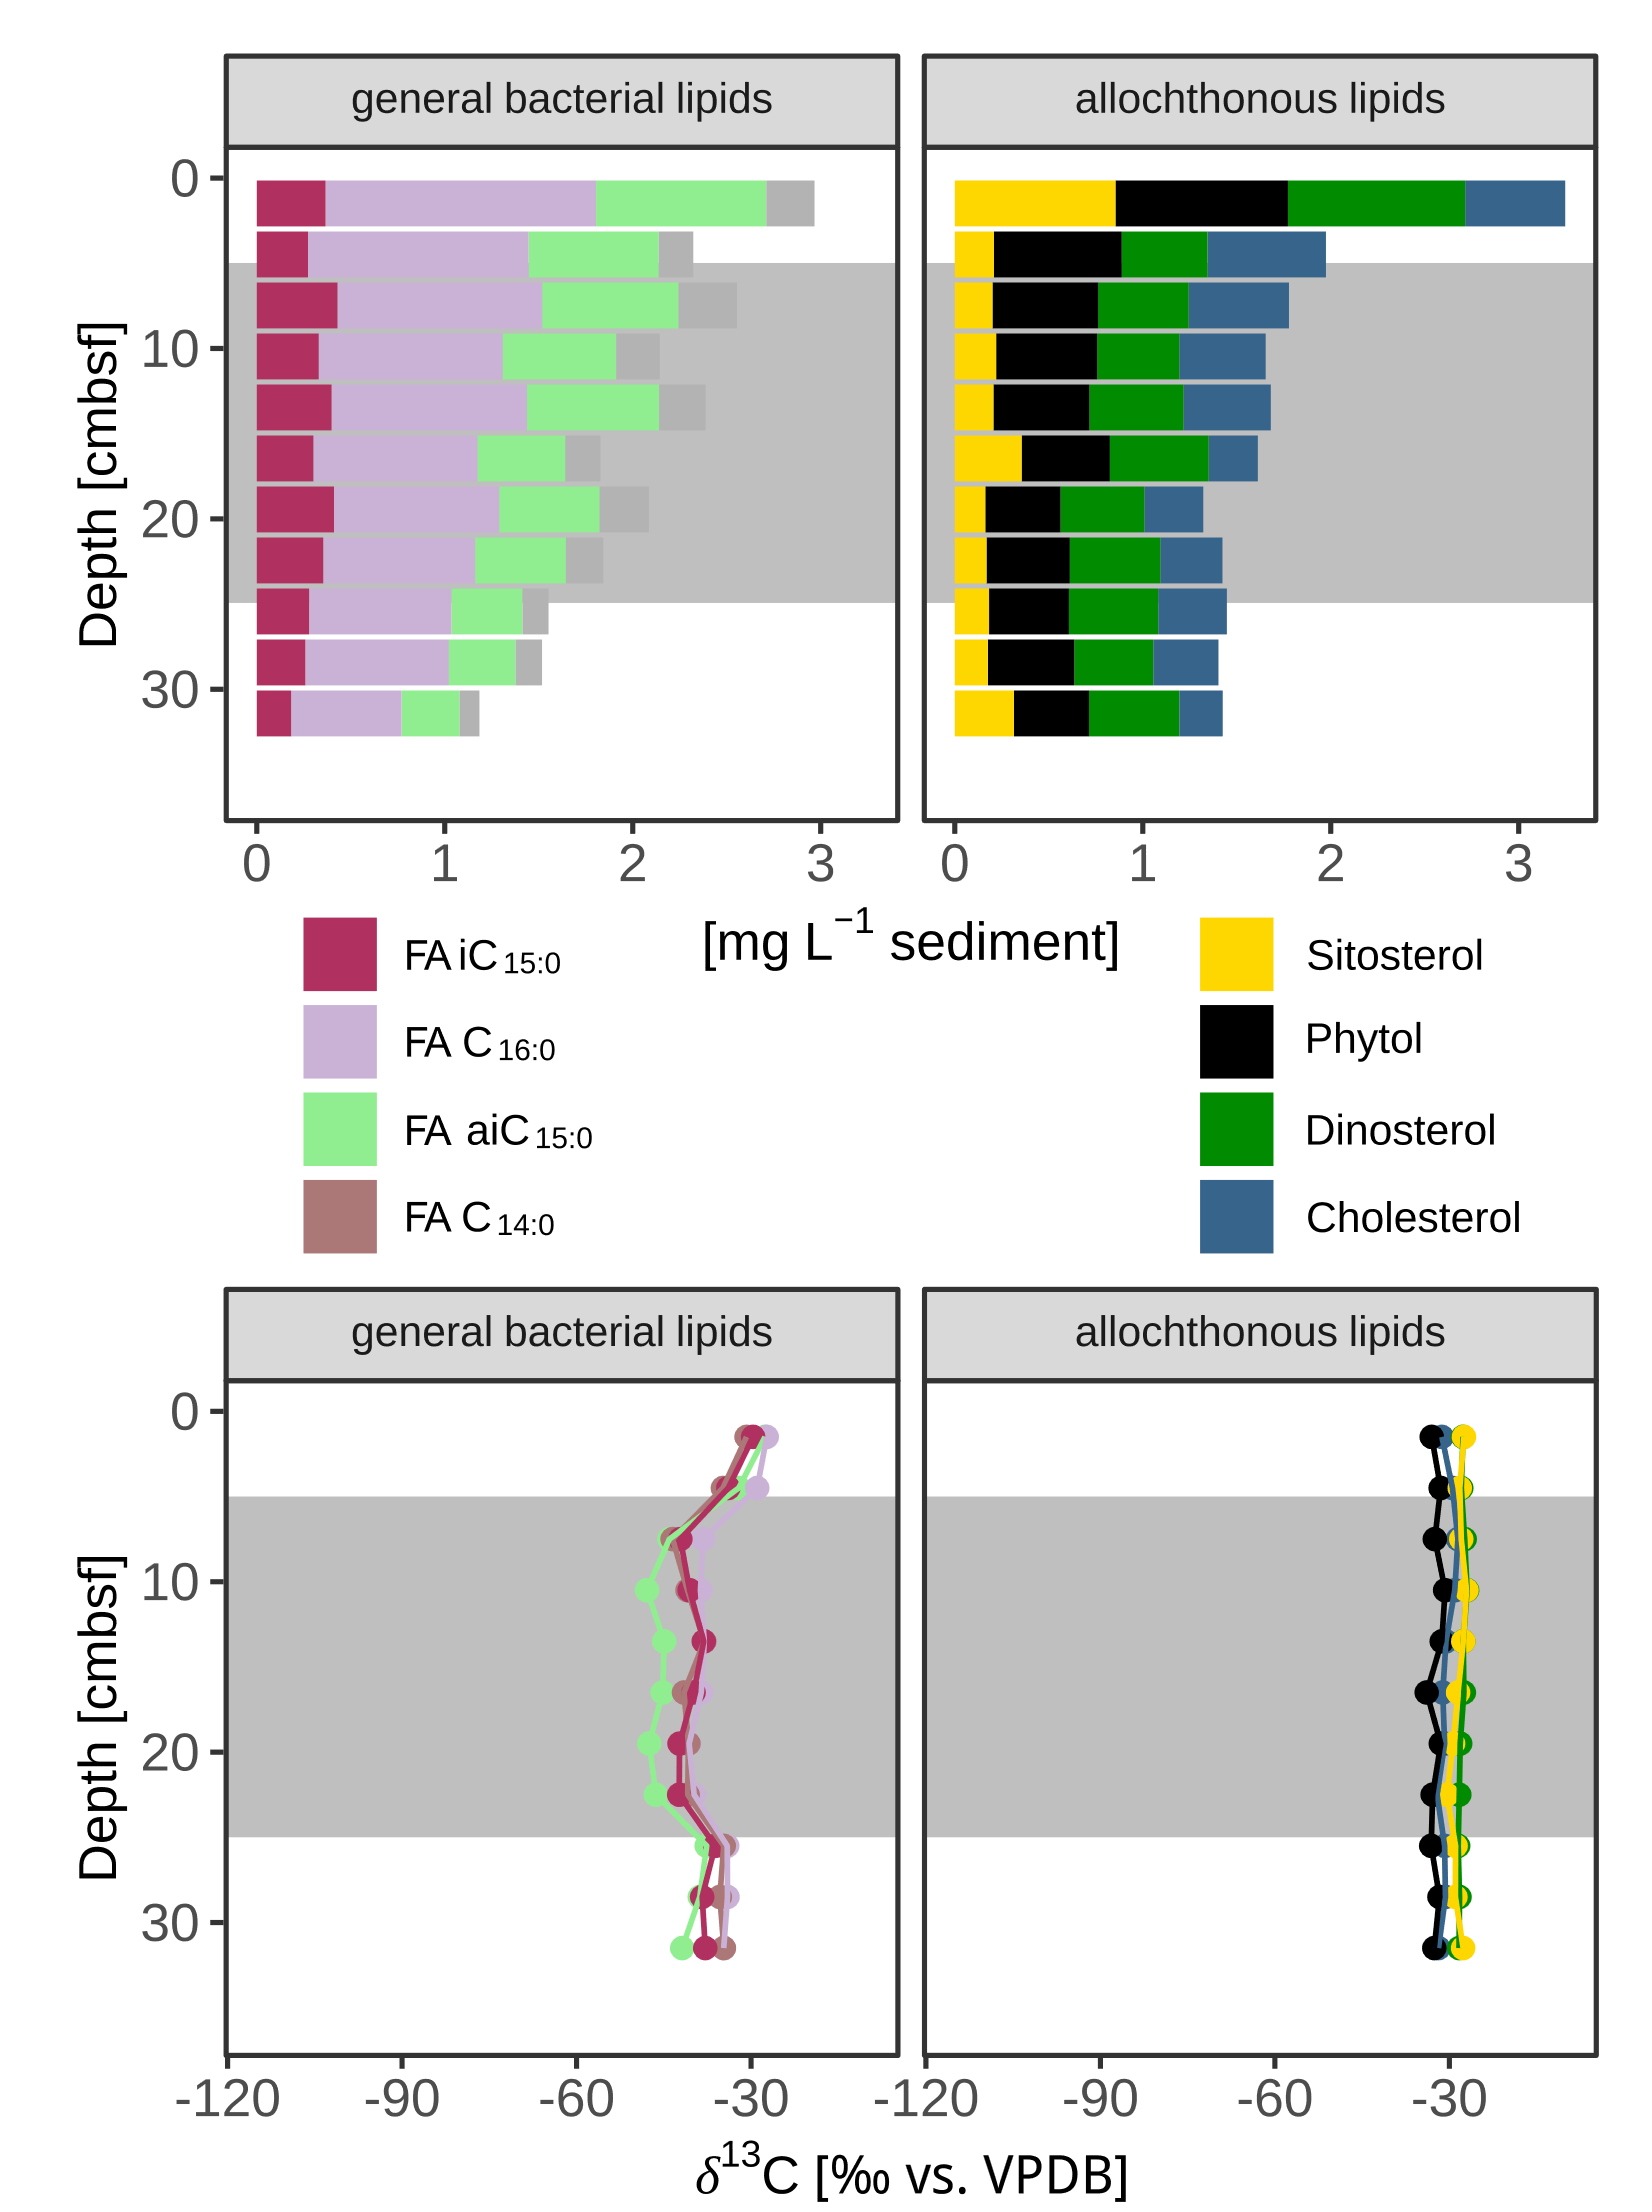


Supplementary Fig. 6: Concentrations and δ13C values of additional lipids in the cold seep sediment core (MUC09-3).

Depth profiles of concentrations of heterotrophic and ubiquitous bacterial as well as algal lipids in mg L-1 (upper panels) and their corresponding δ13C values in‰ vs. VPDB (lower panels). The grey area indicates the SMTZ.


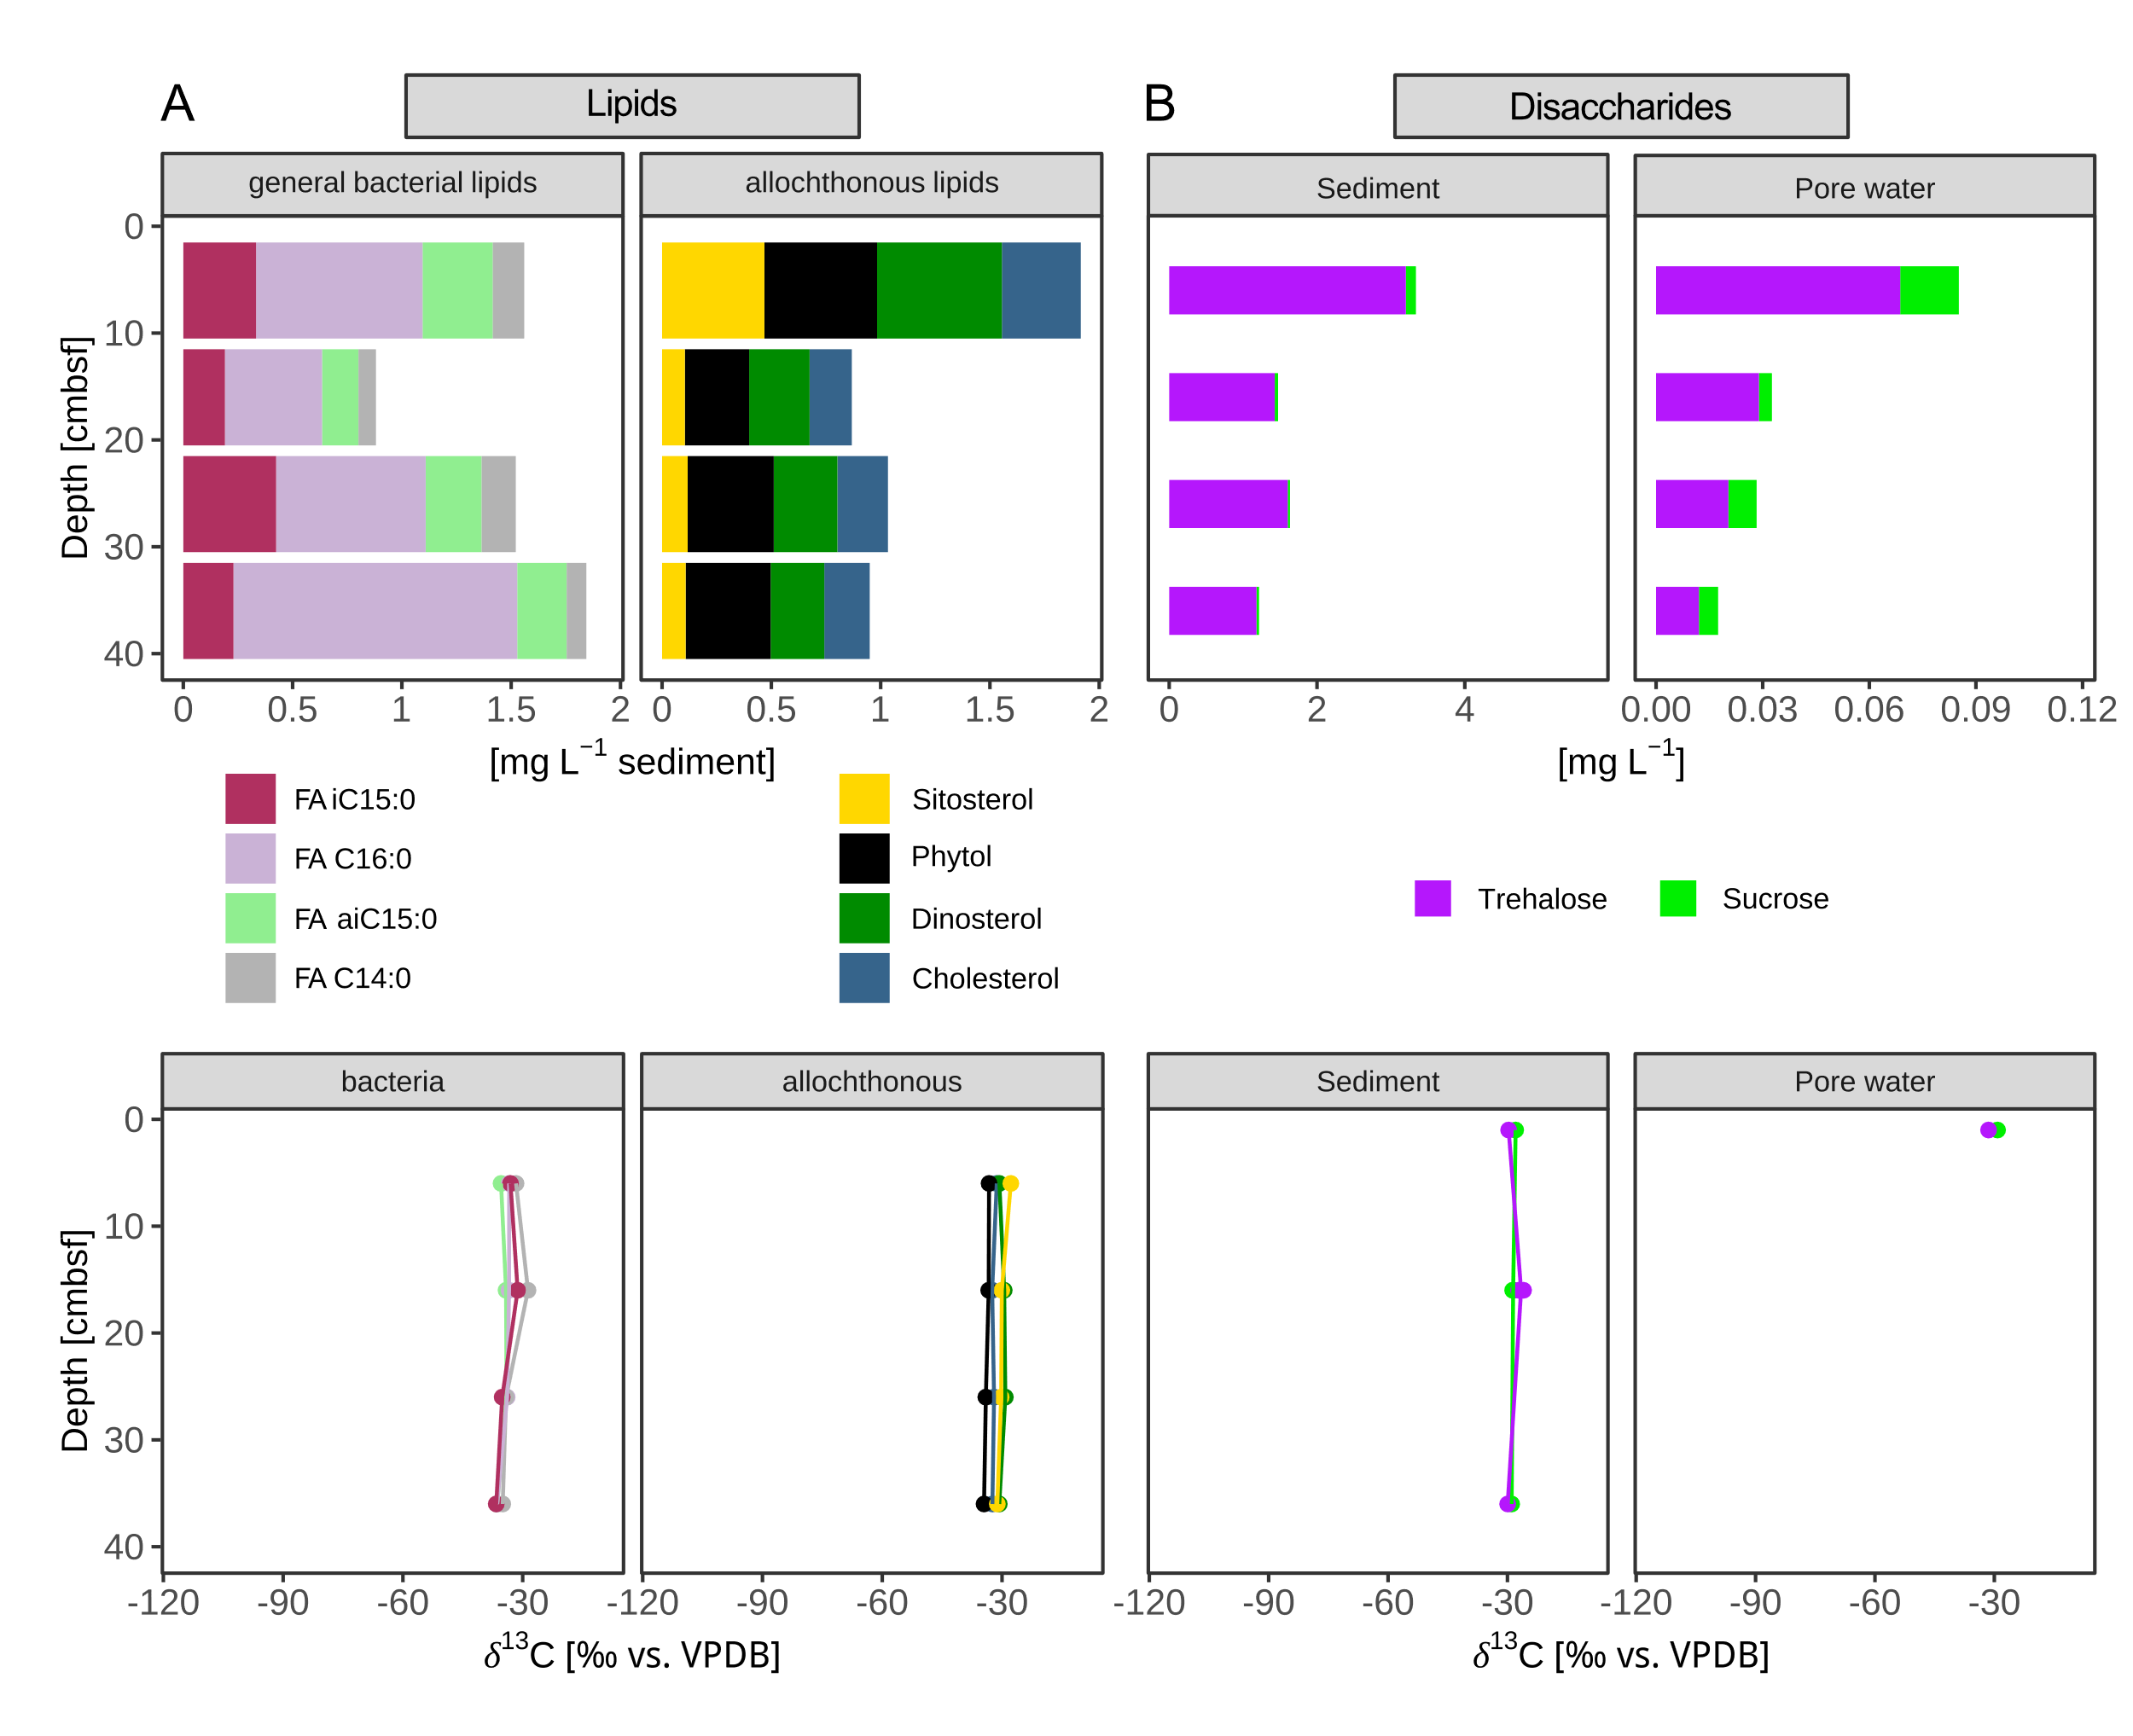


Supplementary Fig. 7: Concentrations and δ13C values of lipids and the disaccharides trehalose and sucrose in the reference core (MUC08-4).

A) Depth profiles of concentrations of heterotrophic and ubiquitous bacterial as well as algal lipids in mg L-1 (top) and their δ13C values in‰ vs. VPDB (bottom). B) Concentrations of trehalose (purple) and sucrose (green) obtained from the bulk sediment and the porewater (top) and their corresponding δ13C values (bottom).

## Hydrolyzed monosaccharides


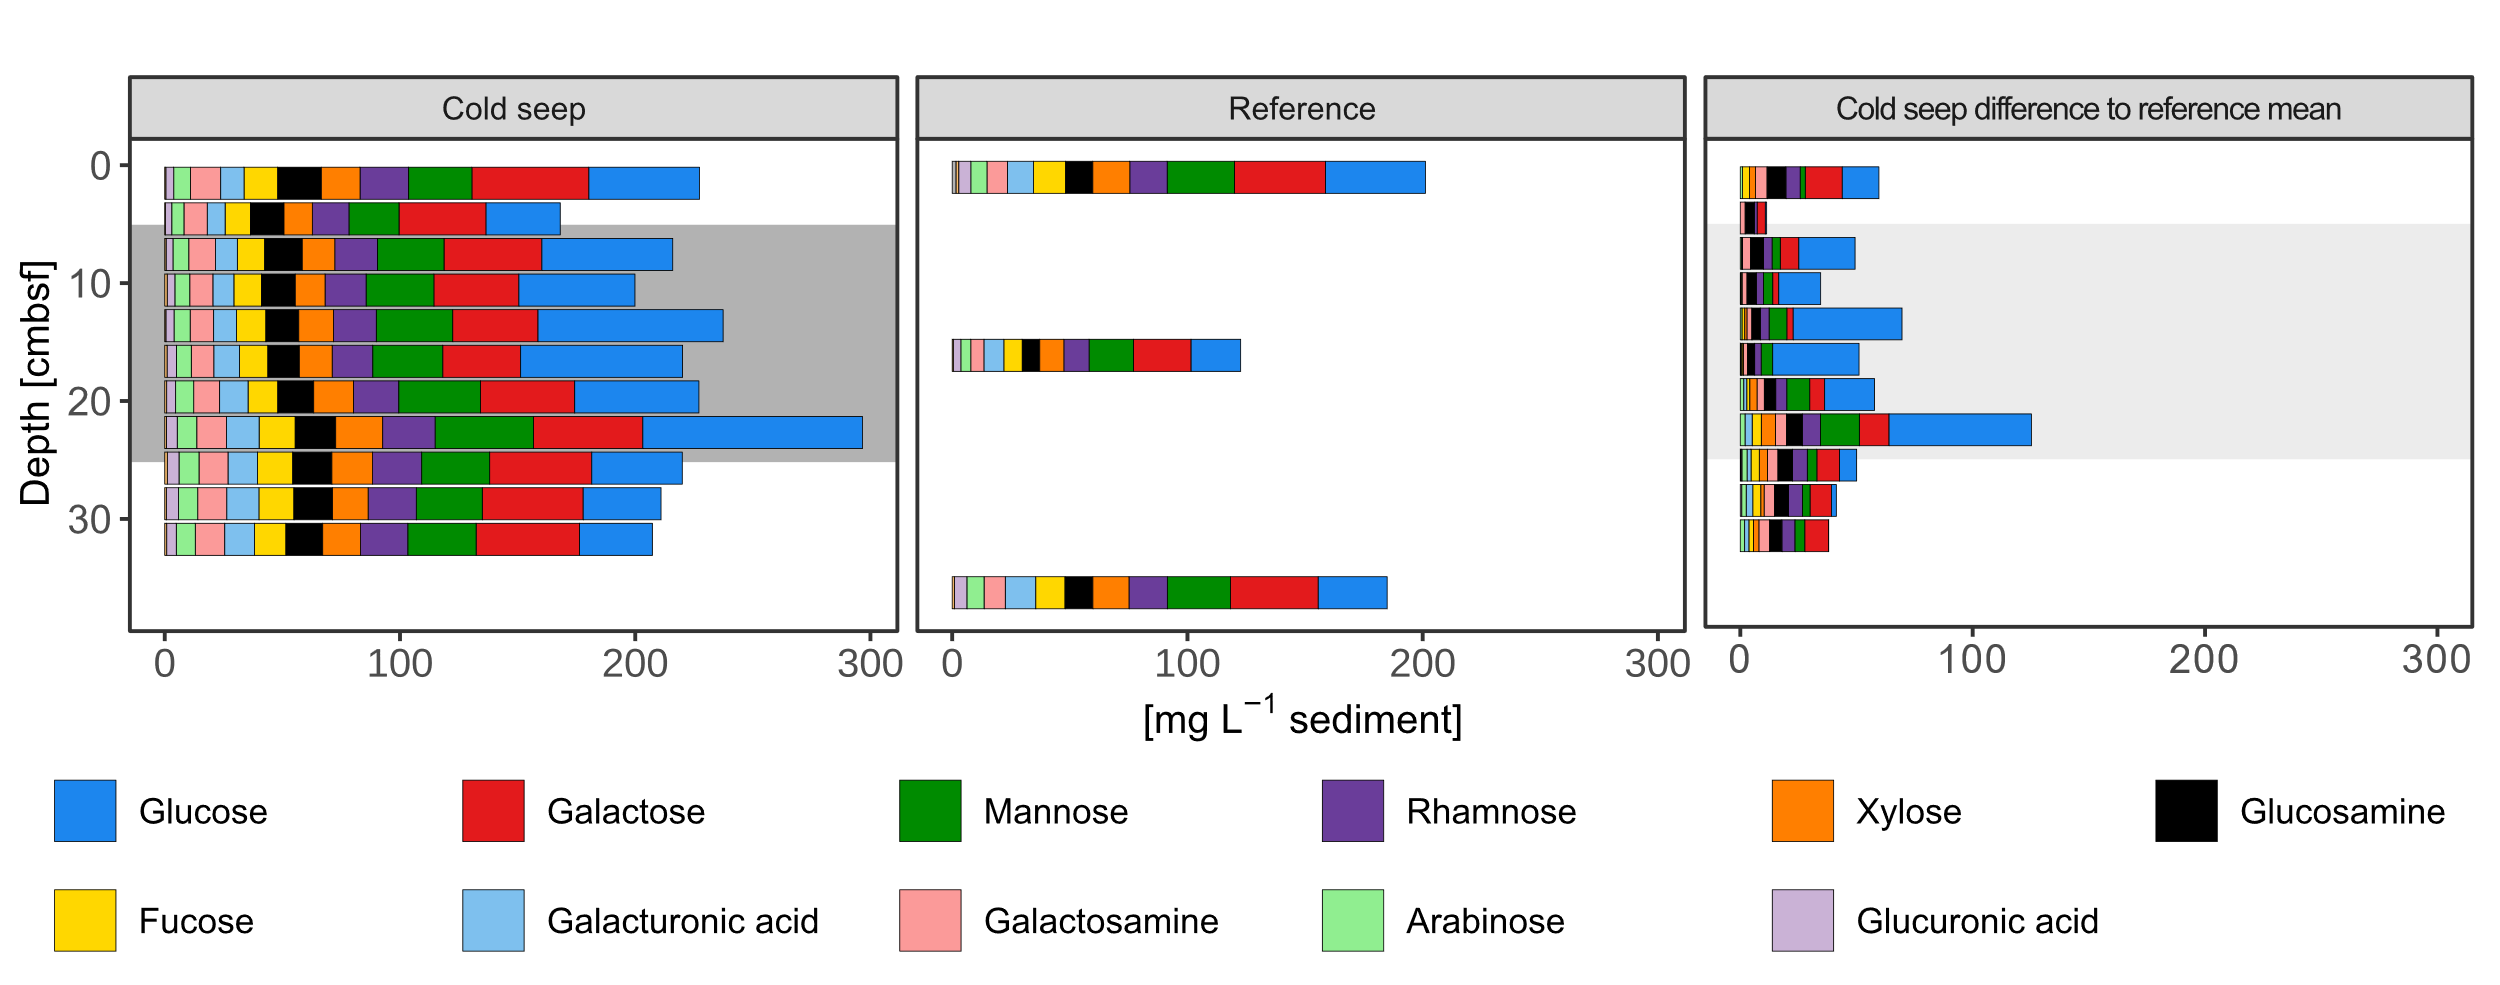


Supplementary Fig. 8: Concentrations of hydrolyzed monosaccharides in the cold seep sediment (MUC09-3, left), the reference core (MUC08-4, middle) and the difference of the concentrations in the cold seep core to mean (n=3) reference values (right). The grey area indicates the SMTZ. Concentrations are in mg L-1. Each color represents a hydrolyzed monosaccharide.

Supplementary Table 6: Corresponding concentrations of hydrolyzed monosaccharides in mg L-1 in tabular form from Supplementary Fig. 8.

| **Core** | **MUC09-3** | | | | | | | | | | | **MUC08-4** | | |
| --- | --- | --- | --- | --- | --- | --- | --- | --- | --- | --- | --- | --- | --- | --- |
| **Depth [cmbsf]** | 1.5 | 4.5 | 7.5 | 10.5 | 13.5 | 16.5 | 19.5 | 22.5 | 25.5 | 28.5 | 31.5 | 1 | 16 | 36 |
| **ID** | 335 | 336 | 337 | 338 | 339 | 340 | 341 | 342 | 343 | 344 | 345 | 275 | 278 | 282 |
| **Type** | **Cold seep** | | | | | | | | | | | **Reference** | | |
|  | **[mg L-1]** | | | | | | | | | | | | | |
| **Fucose** | 14.1 | 10.6 | 11.4 | 11.6 | 12.3 | 11.9 | 12.4 | 15.1 | 14.7 | 14.6 | 13.1 | 13.4 | 7.7 | 12.2 |
| **Rhamnose** | 20.3 | 15.3 | 17.8 | 17.2 | 17.9 | 16.9 | 18.9 | 21.9 | 20.5 | 20.1 | 19.8 | 15.6 | 10.6 | 16.0 |
| **Galactosamine** | 12.6 | 9.8 | 11.1 | 9.7 | 9.8 | 9.5 | 10.8 | 12.4 | 12.2 | 12.1 | 12.3 | 8.5 | 5.5 | 8.9 |
| **Arabinose** | 7.0 | 5.1 | 6.6 | 6.2 | 6.7 | 6.2 | 7.5 | 8.1 | 8.3 | 8.0 | 7.9 | 6.7 | 4.1 | 7.2 |
| **Glucosamine** | 18.2 | 14.0 | 15.7 | 14.0 | 13.7 | 13.1 | 15.0 | 16.9 | 16.3 | 16.1 | 15.3 | 11.3 | 7.3 | 11.6 |
| **Galactose** | 48.8 | 36.3 | 40.8 | 35.5 | 35.6 | 32.5 | 39.3 | 45.7 | 42.6 | 42.1 | 43.1 | 37.9 | 24.0 | 36.6 |
| **Glucose** | 46.1 | 30.9 | 54.6 | 48.4 | 77.2 | 67.5 | 51.8 | 91.6 | 37.8 | 32.5 | 30.4 | 41.7 | 20.7 | 28.7 |
| **Mannose** | 26.4 | 20.8 | 27.7 | 28.2 | 31.8 | 29.2 | 34.1 | 40.9 | 28.3 | 27.5 | 28.4 | 28.0 | 18.5 | 26.3 |
| **Xylose** | 16.1 | 11.8 | 13.6 | 12.4 | 14.4 | 13.7 | 16.6 | 19.6 | 17.0 | 14.9 | 15.8 | 15.4 | 10.0 | 15.1 |
| **Gluconic acid** | 0.0 | 0.0 | 0.0 | 0.0 | 0.0 | 0.0 | 0.0 | 0.0 | 0.0 | 0.0 | 0.0 | 1.6 | 0.0 | 0.0 |
| **Galacturonic acid** | 9.7 | 7.4 | 9.1 | 8.7 | 9.5 | 10.6 | 11.9 | 13.6 | 12.2 | 13.4 | 12.4 | 10.9 | 8.2 | 12.7 |
| **Glucuronic acid** | 3.3 | 2.7 | 2.9 | 3.2 | 3.4 | 3.9 | 3.7 | 4.5 | 4.9 | 5.1 | 4.0 | 5.0 | 3.1 | 5.2 |
| **Mannuronic acid** | 0.4 | 0.2 | 0.6 | 1.0 | 0.5 | 1.0 | 0.8 | 0.7 | 1.1 | 0.7 | 0.8 | 1.1 | 0.5 | 0.9 |

Method:Carbohydrates were sequentially extracted from sediment following the procedure described by Hellige et al. (preprint). Core sections of MUC09-3 and MUC08 from the Astoria Canyon cold seep and reference were analyzed. Approximately 90 mg of freeze-dried and homogenized sediment were weighed into pre-cleaned 2 mL polypropylene tubes. Extractions were performed sequentially with MilliQ water and 0.3 M EDTA (pH 7.5). For each extraction step, 200 µL of solvent was added per 10 mg sediment. Samples were vortexed, sonicated for 1 h, and centrifuged at 4000 g for 20 min at 15°C. The supernatant was transferred to fresh 2 mL tubes. The extraction was repeated with the subsequent solvents on the remaining pellet, with careful resuspension between steps. Extracts were stored at −20°C until further processing. Extracts were hydrolysed in 1 M HCl in precombusted glass vials. Vials were sealed and heated at 100°C for 24h. Hydrolyzed samples were transferred to polypropylene tubes and dried in an acid-resistant vacuum concentrator (Martin Christ Gefriertrocknungsanlagen GmbH, Germany). Residues were resuspended in MilliQ water. Monosaccharide quantification was conducted by high-performance anion-exchange chromatography with pulsed amperometric detection (HPAEC-PAD), as described previously (Hellige et al. (preprint) after Vidal-Melgosa et al., 2021). Analyses were carried out on a Dionex ICS-5000+ system equipped with a CarboPac PA10 analytical column (2 × 250 mm) and guard column (250 mm). Neutral and amino sugars were separated under isocratic conditions with 18 mM NaOH, while a gradient up to 200 mM sodium acetate was applied for the elution of acidic monosaccharides. Acidic polysaccharides were unable to be measured in EDTA extracts due to interfering matrix peaks.

## References

Baumberger, T., Embley, R.W., Merle, S.G., Lilley, M.D., Raineault, N.A., Lupton, J.E., 2018. Mantle-Derived Helium and Multiple Methane Sources in Gas Bubbles of Cold Seeps Along the Cascadia Continental Margin. Geochemistry, Geophysics, Geosystems 19, 4476–4486. https://doi.org/10.1029/2018GC007859

Baumberger, T., Leifer, I., Scherwath, M., Joye, S., 2022. Editorial: Recent Advances in Natural Methane Seep and Gas Hydrate Systems. Frontiers in Earth Science 10.

Coon, G.R., Duesing, P.D., Paul, R., Baily, J.A., Lloyd, K.G., 2023. Biological methane production and accumulation under sulfate-rich conditions at Cape Lookout Bight, NC. Front. Microbiol. 14, 1268361. https://doi.org/10.3389/fmicb.2023.1268361

Hellige, I., Mundanatt, A.A., Massing, J.C., Hehemann, J.-H., 2024. Roots of coastal plants stabilize carbon fixed by marine algae. https://doi.org/10.1101/2024.12.02.624615

Lalk, E., Pohlman, J.W., Lapham, L.L., 2025. Organic Matter Availability and the Production of Methane‐Derived Dissolved Organic Carbon at Methane Seeps. Global Biogeochemical Cycles 39. https://doi.org/10.1029/2025gb008535

Stock, L., Wegener, G., Wang, Y., Zander, Y., Elvert, M., 2025. Marine Cold Seep ANME ‐2/ SRB Consortia Produce Their Lipid Biomass From Inorganic Carbon. Environmental Microbiology 27, e70213. https://doi.org/10.1111/1462-2920.70213

Vidal-Melgosa, S., Sichert, A., Francis, T.B., Bartosik, D., Niggemann, J., Wichels, A., Willats, W.G.T., Fuchs, B.M., Teeling, H., Becher, D., Schweder, T., Amann, R., Hehemann, J.-H., 2021. Diatom fucan polysaccharide precipitates carbon during algal blooms. Nat Commun 12, 1150. https://doi.org/10.1038/s41467-021-21009-6

Whiticar, M.J., 1999. Carbon and hydrogen isotope systematics of bacterial formation and oxidation of methane. Chemical Geology 161, 291–314. https://doi.org/10.1016/S0009-2541(99)00092-3
